# Supplementary material for: Halogen⋯halogen interactions in decahalo-closo-carboranes: CSD analysis and theoretical study
Source: Royal Society of Chemistry journal article supplement (doi:10.1039/d0cp00114g), 2020-01-01
Supplement: d0cp00114g1.pdf [file d0cp00114g1.pdf]

## Halogen···halogen interactions in decahalo-closo-carboranes: CSD analysis and theoretical study

Maria de las Nieves Piña<sup>a</sup>, Antonio Bauzá<sup>a,\*</sup> and Antonio Frontera<sup>a,\*</sup>

<sup>a</sup>Department of Chemistry, Universitat de les Illes Balears  
Crta. de Valldemossa km 7.5, 07122 Palma de Mallorca (Spain)  
E-mail: toni.frontera@uib.es

### FigS1

The MEP (Molecular Electrostatic Potential) surfaces for compounds **7** to **9** are gathered in FigS1. As noted, the maximum values of electrostatic potential region are located along the C-H bonds, similarly to the *ortho* and *meta* series (**1** to **6**). However, all B-X bonds exhibit a nearly identical MEP value, due to the symmetry of the *para* series. Also in close agreement to the *ortho* and *meta* series (**1** to **6**), the  $\sigma$ -hole MEP values over the halogen atoms increase while the MEP values over the H atoms become less positive ongoing from compound **7** to **9**. Finally, the fact the halogen atoms show large green areas where the MEP value is close to zero, also supports the fact that these B-X bonds are well rounded to undergo type I halogen···halogen “like-like” interactions.

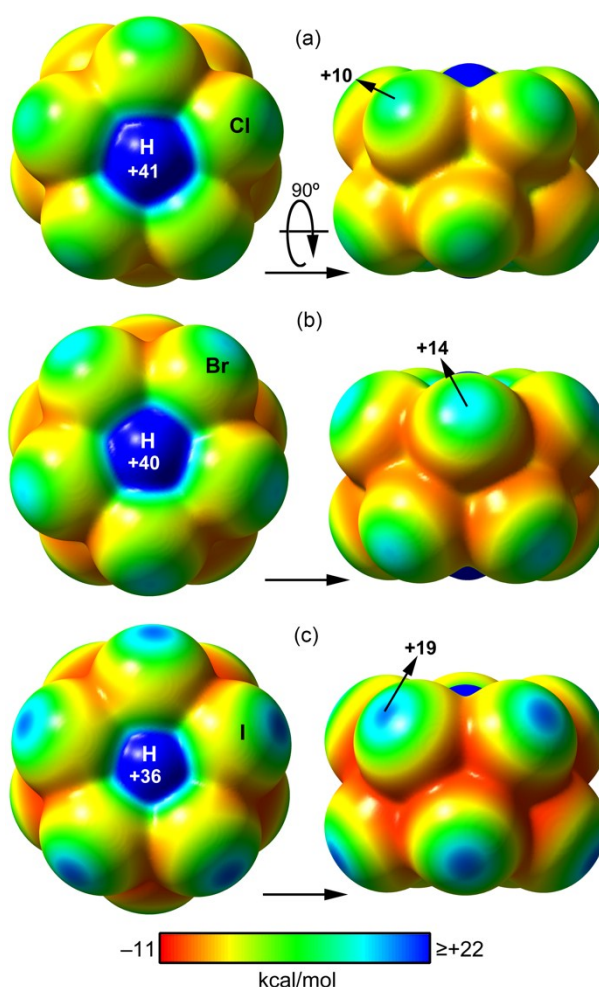

**Fig.S1** Two views of the MEP surfaces for ortho compounds **7** (a), **8** (b) and **9** (c). Energy values at selected points of the surface (0.001 a.u.) are given in kcal/mol.

Table S1. SAPT interaction energies ( $E_{\text{total}}$ , kcal/mol) and their partitioning into the electrostatic, exchange, induction, dispersion and contributions (Elst, Exch, Ind and Disp, respectively, kcal/mol) using the DF-DFT-SAPT approach at the PBE0-D/def2-TZVP

| Complex   | Elst  | Exch | Ind   | Disp  | Etotal |
|-----------|-------|------|-------|-------|--------|
| <b>10</b> | -0.78 | 1.51 | -0.11 | -3.16 | -2.54  |
| <b>11</b> | -1.12 | 2.18 | -0.15 | -3.52 | -2.61  |
| <b>12</b> | -1.63 | 2.67 | -0.54 | -3.86 | -3.37  |
| <b>17</b> | -1.01 | 1.23 | -0.10 | -2.84 | -2.72  |
| <b>18</b> | -1.85 | 2.65 | -0.55 | -3.92 | -3.66  |
| <b>22</b> | -1.03 | 1.99 | -0.05 | -2.59 | -1.68  |
| <b>23</b> | -1.39 | 1.63 | -0.09 | -3.00 | -2.85  |
| <b>24</b> | -1.70 | 1.28 | -0.52 | -3.00 | -3.95  |

## Cartesian Coordinates

### 10.

|    |            |            |            |
|----|------------|------------|------------|
| B  | 5.3536701  | -0.4921201 | 1.4606930  |
| B  | 4.0687527  | -1.6020316 | 0.8987136  |
| B  | 4.0687527  | -1.6020316 | -0.8987136 |
| B  | 5.3536701  | -0.4921201 | -1.4606930 |
| B  | 4.9464287  | 1.1565012  | 0.8989933  |
| B  | 3.6610964  | 0.0463211  | 1.4688731  |
| B  | 2.8569012  | -0.6409998 | 0.0000000  |
| B  | 3.6610964  | 0.0463211  | -1.4688731 |
| B  | 4.9464287  | 1.1565012  | -0.8989933 |
| C  | 5.4950042  | -1.3835099 | 0.0000000  |
| H  | 6.2680343  | -2.1414918 | 0.0000000  |
| B  | 3.4013350  | 1.0720842  | 0.0000000  |
| C  | 5.9840736  | 0.1535489  | 0.0000000  |
| H  | 7.0525638  | 0.3255136  | 0.0000000  |
| Cl | 6.4243467  | -0.8337772 | 2.7970483  |
| Cl | 3.7881138  | -3.0898621 | 1.7811466  |
| Cl | 2.8094717  | 0.3158480  | 2.9829505  |
| Cl | 1.1613407  | -1.0965897 | 0.0000000  |
| Cl | 2.2796094  | 2.4250239  | 0.0000000  |
| Cl | 2.8094717  | 0.3158480  | -2.9829505 |
| Cl | 6.4243467  | -0.8337772 | -2.7970483 |
| Cl | 3.7881138  | -3.0898621 | -1.7811466 |
| Cl | 5.5788555  | 2.5314094  | -1.7819655 |
| Cl | 5.5788555  | 2.5314094  | 1.7819655  |
| B  | -4.9600026 | -0.5572832 | -1.4606086 |
| B  | -3.2599880 | -0.5490673 | -0.8995258 |
| B  | -3.2599880 | -0.5490673 | 0.8995258  |
| B  | -4.9600026 | -0.5572832 | 1.4606086  |
| B  | -5.7376786 | 0.9532336  | -0.8991028 |
| B  | -4.0387639 | 0.9607789  | -1.4690820 |
| B  | -2.9788290 | 0.9735104  | 0.0000000  |
| B  | -4.0387639 | 0.9607789  | 1.4690820  |
| B  | -5.7376786 | 0.9532336  | 0.8991028  |
| C  | -4.4796274 | -1.3211285 | 0.0000000  |
| H  | -4.5641454 | -2.3999221 | 0.0000000  |
| B  | -4.5174320 | 1.9042124  | 0.0000000  |
| C  | -5.8601932 | -0.4843837 | 0.0000000  |
| H  | -6.7776139 | -1.0577997 | 0.0000000  |

|    |            |            |            |
|----|------------|------------|------------|
| C1 | -5.5430688 | -1.5191692 | -2.7962520 |
| C1 | -2.0753374 | -1.4870173 | -1.7854979 |
| C1 | -3.5773248 | 1.7227899  | -2.9849327 |
| C1 | -1.4041770 | 1.7498534  | 0.0000000  |
| C1 | -4.5576319 | 3.6619808  | 0.0000000  |
| C1 | -3.5773248 | 1.7227899  | 2.9849327  |
| C1 | -5.5430688 | -1.5191692 | 2.7962520  |
| C1 | -2.0753374 | -1.4870173 | 1.7854979  |
| C1 | -7.1181778 | 1.5734947  | 1.7829517  |
| C1 | -7.1181778 | 1.5734947  | -1.7829517 |

#### 10. (B3LYP-D3/def2-TZVP)

|    |            |            |            |
|----|------------|------------|------------|
| B  | 5.3478133  | -0.4898062 | 1.4700703  |
| B  | 4.0603055  | -1.6081369 | 0.9040698  |
| B  | 4.0603055  | -1.6081369 | -0.9040698 |
| B  | 5.3478133  | -0.4898062 | -1.4700703 |
| B  | 4.9346151  | 1.1649123  | 0.9044256  |
| B  | 3.6506384  | 0.0449973  | 1.4769080  |
| B  | 2.8438865  | -0.6471771 | 0.0000000  |
| B  | 3.6506384  | 0.0449973  | -1.4769080 |
| B  | 4.9346151  | 1.1649123  | -0.9044256 |
| C  | 5.4909678  | -1.3874902 | 0.0000000  |
| H  | 6.2659294  | -2.1407102 | 0.0000000  |
| B  | 3.3863242  | 1.0746976  | 0.0000000  |
| C  | 5.9801492  | 0.1630702  | 0.0000000  |
| H  | 7.0465767  | 0.3352156  | 0.0000000  |
| C1 | 6.4286618  | -0.8316829 | 2.8123564  |
| C1 | 3.7765577  | -3.1053957 | 1.7931130  |
| C1 | 2.7892074  | 0.3151418  | 2.9996378  |
| C1 | 1.1376474  | -1.1076759 | 0.0000000  |
| C1 | 2.2530785  | 2.4336404  | 0.0000000  |
| C1 | 2.7892074  | 0.3151418  | -2.9996378 |
| C1 | 6.4286618  | -0.8316829 | -2.8123564 |
| C1 | 3.7765577  | -3.1053957 | -1.7931130 |
| C1 | 5.5621204  | 2.5527597  | -1.7939875 |
| C1 | 5.5621204  | 2.5527597  | 1.7939875  |
| B  | -4.9547122 | -0.5602708 | -1.4697237 |
| B  | -3.2471855 | -0.5590804 | -0.9049710 |
| B  | -3.2471855 | -0.5590804 | 0.9049710  |
| B  | -4.9547122 | -0.5602708 | 1.4697237  |
| B  | -5.7298092 | 0.9599103  | -0.9044367 |
| B  | -4.0256608 | 0.9567957  | -1.4771073 |
| B  | -2.9601960 | 0.9661721  | 0.0000000  |
| B  | -4.0256608 | 0.9567957  | 1.4771073  |
| B  | -5.7298092 | 0.9599103  | 0.9044367  |
| C  | -4.4725070 | -1.3310020 | 0.0000000  |
| H  | -4.5633098 | -2.4073108 | 0.0000000  |
| B  | -4.5018737 | 1.9070327  | 0.0000000  |
| C  | -5.8612493 | -0.4817601 | 0.0000000  |
| H  | -6.7781476 | -1.0522655 | 0.0000000  |
| C1 | -5.5464369 | -1.5279849 | -2.8115579 |
| C1 | -2.0562281 | -1.5038340 | -1.7980984 |
| C1 | -3.5561925 | 1.7248517  | -3.0017937 |
| C1 | -1.3725021 | 1.7423718  | 0.0000000  |

|    |            |            |            |
|----|------------|------------|------------|
| C1 | -4.5332415 | 3.6772952  | 0.0000000  |
| C1 | -3.5561925 | 1.7248517  | 3.0017937  |
| C1 | -5.5464369 | -1.5279849 | 2.8115579  |
| C1 | -2.0562281 | -1.5038340 | 1.7980984  |
| C1 | -7.1144609 | 1.5947709  | 1.7948739  |
| C1 | -7.1144609 | 1.5947709  | -1.7948739 |

#### 10. BP86-D3/def2-TZVP

|    |            |            |            |
|----|------------|------------|------------|
| B  | 5.3422244  | -0.4928462 | 1.4756067  |
| B  | 4.0436759  | -1.6040795 | 0.9066250  |
| B  | 4.0436759  | -1.6040795 | -0.9066250 |
| B  | 5.3422244  | -0.4928462 | -1.4756067 |
| B  | 4.9412101  | 1.1686796  | 0.9069956  |
| B  | 3.6427440  | 0.0569260  | 1.4795679  |
| B  | 2.8301617  | -0.6310578 | 0.0000000  |
| B  | 3.6427440  | 0.0569260  | -1.4795679 |
| B  | 4.9412101  | 1.1686796  | -0.9069956 |
| C  | 5.4815067  | -1.3960142 | 0.0000000  |
| H  | 6.2552696  | -2.1624392 | 0.0000000  |
| B  | 3.3872945  | 1.0908400  | 0.0000000  |
| C  | 5.9845351  | 0.1568674  | 0.0000000  |
| H  | 7.0601406  | 0.3240169  | 0.0000000  |
| C1 | 6.4167179  | -0.8420449 | 2.8231587  |
| C1 | 3.7462154  | -3.0997909 | 1.7960427  |
| C1 | 2.7831181  | 0.3336667  | 3.0026740  |
| C1 | 1.1196979  | -1.0790375 | 0.0000000  |
| C1 | 2.2663112  | 2.4608993  | 0.0000000  |
| C1 | 2.7831181  | 0.3336667  | -3.0026740 |
| C1 | 6.4167179  | -0.8420449 | -2.8231587 |
| C1 | 3.7462154  | -3.0997909 | -1.7960427 |
| C1 | 5.5782138  | 2.5533573  | -1.7971578 |
| C1 | 5.5782138  | 2.5533573  | 1.7971578  |
| B  | -4.9504310 | -0.5663042 | -1.4755691 |
| B  | -3.2386901 | -0.5658083 | -0.9076692 |
| B  | -3.2386901 | -0.5658083 | 0.9076692  |
| B  | -4.9504310 | -0.5663042 | 1.4755691  |
| B  | -5.7277649 | 0.9572776  | -0.9071767 |
| B  | -4.0176732 | 0.9564104  | -1.4799102 |
| B  | -2.9500435 | 0.9641286  | 0.0000000  |
| B  | -4.0176732 | 0.9564104  | 1.4799102  |
| B  | -5.7277649 | 0.9572776  | 0.9071767  |
| C  | -4.4675064 | -1.3421880 | 0.0000000  |
| H  | -4.5573992 | -2.4268501 | 0.0000000  |
| B  | -4.4960782 | 1.9079342  | 0.0000000  |
| C  | -5.8619858 | -0.4895094 | 0.0000000  |
| H  | -6.7867667 | -1.0628674 | 0.0000000  |
| C1 | -5.5398654 | -1.5312311 | -2.8224236 |
| C1 | -2.0472147 | -1.5103011 | -1.8026878 |
| C1 | -3.5477063 | 1.7247781  | -3.0049219 |
| C1 | -1.3616667 | 1.7408467  | 0.0000000  |
| C1 | -4.5280058 | 3.6788747  | 0.0000000  |
| C1 | -3.5477063 | 1.7247781  | 3.0049219  |
| C1 | -5.5398654 | -1.5312311 | 2.8224236  |
| C1 | -2.0472147 | -1.5103011 | 1.8026878  |
| C1 | -7.1125063 | 1.5940885  | 1.7984479  |

C1 -7.1125063 1.5940885 -1.7984479

**11.**

|    |            |            |            |
|----|------------|------------|------------|
| B  | 5.9078227  | -0.1261265 | 1.4606280  |
| B  | 5.0020052  | -1.5629094 | 0.8992014  |
| B  | 5.0020052  | -1.5629094 | -0.8992014 |
| B  | 5.9078227  | -0.1261265 | -1.4606280 |
| B  | 5.0368534  | 1.3322557  | 0.8991987  |
| B  | 4.1313247  | -0.1046360 | 1.4664609  |
| B  | 3.5629873  | -0.9962438 | 0.0000000  |
| B  | 4.1313247  | -0.1046360 | -1.4664609 |
| B  | 5.0368534  | 1.3322557  | -0.8991987 |
| C  | 6.3026920  | -0.9399082 | 0.0000000  |
| H  | 7.2632795  | -1.4376923 | 0.0000000  |
| B  | 3.5838932  | 0.8010581  | 0.0000000  |
| C  | 6.3221929  | 0.6777375  | 0.0000000  |
| H  | 7.2946085  | 1.1521257  | 0.0000000  |
| B  | -5.7874801 | -0.3379856 | -1.4596516 |
| B  | -4.2969705 | -1.1525125 | -0.8983174 |
| B  | -4.2969705 | -1.1525125 | 0.8983174  |
| B  | -5.7874801 | -0.3379856 | 1.4596516  |
| B  | -5.7351964 | 1.3601707  | -0.8989220 |
| B  | -4.2461635 | 0.5443352  | -1.4659353 |
| B  | -3.3142644 | 0.0425703  | 0.0000000  |
| B  | -4.2461635 | 0.5443352  | 1.4659353  |
| B  | -5.7351964 | 1.3601707  | 0.8989220  |
| C  | -5.7368251 | -1.2402749 | 0.0000000  |
| H  | -6.3344111 | -2.1419700 | 0.0000000  |
| B  | -4.2071095 | 1.6009006  | 0.0000000  |
| C  | -6.5395648 | 0.1632514  | 0.0000000  |
| H  | -7.6199281 | 0.1054961  | 0.0000000  |
| Br | -6.8637028 | -0.9533965 | 2.9096946  |
| Br | -6.7195943 | 2.6826644  | 1.8705778  |
| Br | -6.7195943 | 2.6826644  | -1.8705778 |
| Br | -3.3203463 | 3.3029696  | 0.0000000  |
| Br | -3.4102189 | 1.0209976  | -3.1257538 |
| Br | -3.4102189 | 1.0209976  | 3.1257538  |
| Br | -1.4003441 | -0.0576588 | 0.0000000  |
| Br | -3.6517104 | -2.6692369 | -1.8698669 |
| Br | -3.6517104 | -2.6692369 | 1.8698669  |
| Br | 1.9387873  | -2.0183662 | 0.0000000  |
| Br | 3.1659238  | -0.0933011 | 3.1244301  |
| Br | 3.1659238  | -0.0933011 | -3.1244301 |
| Br | 1.9842261  | 1.8597568  | 0.0000000  |
| Br | 5.2524769  | 2.9661680  | -1.8708330 |
| Br | 5.2524769  | 2.9661680  | 1.8708330  |
| Br | 7.1468097  | -0.1413616 | -2.9108940 |
| Br | 7.1468097  | -0.1413616 | 2.9108940  |
| Br | 5.1778838  | -3.2020013 | 1.8706931  |
| Br | 5.1778838  | -3.2020013 | -1.8706931 |
| Br | -6.8637028 | -0.9533965 | -2.9096946 |

**12.**

B 5.9045082 -0.4508700 1.4633857

|   |            |            |            |
|---|------------|------------|------------|
| B | 4.6474356  | -1.5953579 | 0.9000893  |
| B | 4.6474356  | -1.5953579 | -0.9000893 |
| B | 5.9045082  | -0.4508700 | -1.4633857 |
| B | 5.4537920  | 1.1880555  | 0.9003861  |
| B | 4.1945142  | 0.0437770  | 1.4669280  |
| B | 3.4075065  | -0.6659201 | 0.0000000  |
| B | 4.1945142  | 0.0437770  | -1.4669280 |
| B | 5.4537920  | 1.1880555  | -0.9003861 |
| C | 6.0656163  | -1.3392831 | 0.0000000  |
| H | 6.8609207  | -2.0735015 | 0.0000000  |
| B | 3.9089697  | 1.0618026  | 0.0000000  |
| C | 6.5157094  | 0.2140102  | 0.0000000  |
| H | 7.5797143  | 0.4100221  | 0.0000000  |
| B | -5.5074090 | -0.5847555 | -1.4627778 |
| B | -3.8061192 | -0.5937077 | -0.9001651 |
| B | -3.8061192 | -0.5937077 | 0.9001651  |
| B | -5.5074090 | -0.5847555 | 1.4627778  |
| B | -6.2695786 | 0.9360991  | -0.9003909 |
| B | -4.5682567 | 0.9268698  | -1.4666670 |
| B | -3.5085874 | 0.9290283  | 0.0000000  |
| B | -4.5682567 | 0.9268698  | 1.4666670  |
| B | -6.2695786 | 0.9360991  | 0.9003909  |
| C | -5.0315277 | -1.3525852 | 0.0000000  |
| H | -5.1316939 | -2.4297837 | 0.0000000  |
| B | -5.0371755 | 1.8762118  | 0.0000000  |
| C | -6.4069574 | -0.4983855 | 0.0000000  |
| H | -7.3282202 | -1.0649273 | 0.0000000  |
| I | -6.2526340 | -1.7848652 | 3.0549936  |
| I | -7.9336139 | 1.7098307  | 1.9896579  |
| I | -5.0803534 | 4.0145513  | 0.0000000  |
| I | -4.0096568 | 1.8212816  | 3.3261400  |
| I | -1.5690420 | 1.8241281  | 0.0000000  |
| I | -2.3722964 | -1.7388107 | 1.9901677  |
| I | 1.3615609  | -1.2797501 | 0.0000000  |
| I | 3.1715236  | 0.3387272  | 3.3205748  |
| I | 2.5201389  | 2.6901346  | 0.0000000  |
| I | 4.3508296  | -3.4061118 | 1.9895187  |
| I | 7.2601704  | -0.8447272 | 3.0561147  |
| I | 6.1735014  | 2.8766888  | 1.9882965  |
| I | 6.1735014  | 2.8766888  | -1.9882965 |
| I | 7.2601704  | -0.8447272 | -3.0561147 |
| I | 3.1715236  | 0.3387272  | -3.3205748 |
| I | 4.3508296  | -3.4061118 | -1.9895187 |
| I | -4.0096568 | 1.8212816  | -3.3261400 |
| I | -2.3722964 | -1.7388107 | -1.9901677 |
| I | -7.9336139 | 1.7098307  | -1.9896579 |
| I | -6.2526340 | -1.7848652 | -3.0549936 |

**13.**

|   |           |            |            |
|---|-----------|------------|------------|
| B | 5.4623854 | -0.4377666 | 1.4610473  |
| B | 4.1921617 | -1.5642876 | 0.8987459  |
| B | 4.1921617 | -1.5642876 | -0.8987459 |
| B | 5.4623854 | -0.4377666 | -1.4610473 |
| B | 5.0341453 | 1.2050614  | 0.8990881  |
| B | 3.7627791 | 0.0784477  | 1.4688166  |

|    |            |            |            |
|----|------------|------------|------------|
| B  | 2.9673780  | -0.6194155 | 0.0000000  |
| B  | 3.7627791  | 0.0784477  | -1.4688166 |
| B  | 5.0341453  | 1.2050614  | -0.8990881 |
| C  | 5.6154493  | -1.3271626 | 0.0000000  |
| H  | 6.3982280  | -2.0750736 | 0.0000000  |
| B  | 3.4906660  | 1.1003372  | 0.0000000  |
| C  | 6.0846080  | 0.2158293  | 0.0000000  |
| H  | 7.1507705  | 0.4015791  | 0.0000000  |
| Cl | 6.5373687  | -0.7654231 | 2.7973176  |
| Cl | 3.9307383  | -3.0557522 | 1.7809565  |
| Cl | 2.9068892  | 0.3374028  | 2.9823652  |
| Cl | 1.2778212  | -1.0969666 | 0.0000000  |
| Cl | 2.3564648  | 2.4435725  | 0.0000000  |
| Cl | 2.9068892  | 0.3374028  | -2.9823652 |
| Cl | 6.5373687  | -0.7654231 | -2.7973176 |
| Cl | 3.9307383  | -3.0557522 | -1.7809565 |
| Cl | 5.6478083  | 2.5885136  | -1.7817824 |
| Cl | 5.6478083  | 2.5885136  | 1.7817824  |
| B  | -5.0637521 | -0.6082367 | -1.4592751 |
| B  | -3.3645701 | -0.5886970 | -0.8988021 |
| B  | -3.3645701 | -0.5886970 | 0.8988021  |
| B  | -5.0637521 | -0.6082367 | 1.4592751  |
| B  | -5.8498635 | 0.8974402  | -0.8985572 |
| B  | -4.1519165 | 0.9155685  | -1.4657699 |
| B  | -3.0932222 | 0.9354973  | 0.0000000  |
| B  | -4.1519165 | 0.9155685  | 1.4657699  |
| B  | -5.8498635 | 0.8974402  | 0.8985572  |
| C  | -4.5774226 | -1.3696870 | 0.0000000  |
| H  | -4.6564910 | -2.4487221 | 0.0000000  |
| B  | -4.6355907 | 1.8555330  | 0.0000000  |
| C  | -5.9655275 | -0.5398079 | 0.0000000  |
| H  | -6.8788827 | -1.1193431 | 0.0000000  |
| Br | -1.3730039 | 1.7801776  | 0.0000000  |
| Br | -3.6587120 | 1.7401366  | 3.1266352  |
| Br | -4.6996929 | 3.7735523  | 0.0000000  |
| Br | -3.6587120 | 1.7401366  | -3.1266352 |
| Br | -7.3550446 | 1.5699034  | 1.8703988  |
| Br | -7.3550446 | 1.5699034  | -1.8703988 |
| Br | -5.7003402 | -1.6717523 | -2.9095916 |
| Br | -5.7003402 | -1.6717523 | 2.9095916  |
| Br | -2.0608529 | -1.5955086 | 1.8713367  |
| Br | -2.0608529 | -1.5955086 | -1.8713367 |

**14.**

|   |           |            |            |
|---|-----------|------------|------------|
| B | 5.6144281 | -0.3980684 | 1.4611860  |
| B | 4.3459469 | -1.5265645 | 0.8987450  |
| B | 4.3459469 | -1.5265645 | -0.8987450 |
| B | 5.6144281 | -0.3980684 | -1.4611860 |
| B | 5.1836700 | 1.2439232  | 0.8991893  |
| B | 3.9137934 | 0.1154363  | 1.4688369  |
| B | 3.1194366 | -0.5839957 | 0.0000000  |
| B | 3.9137934 | 0.1154363  | -1.4688369 |
| B | 5.1836700 | 1.2439232  | -0.8991893 |
| C | 5.7689458 | -1.2871242 | 0.0000000  |
| H | 6.5529561 | -2.0337814 | 0.0000000  |

|    |            |            |            |
|----|------------|------------|------------|
| B  | 3.6408659  | 1.1362978  | 0.0000000  |
| C  | 6.2356762  | 0.2565367  | 0.0000000  |
| H  | 7.3015516  | 0.4440631  | 0.0000000  |
| Cl | 6.6896577  | -0.7238317 | 2.7975715  |
| Cl | 4.0865526  | -3.0182809 | 1.7809421  |
| Cl | 3.0566800  | 0.3734081  | 2.9818495  |
| Cl | 1.4311324  | -1.0659311 | 0.0000000  |
| Cl | 2.5080837  | 2.4819357  | 0.0000000  |
| Cl | 3.0566800  | 0.3734081  | -2.9818495 |
| Cl | 6.6896577  | -0.7238317 | -2.7975715 |
| Cl | 4.0865526  | -3.0182809 | -1.7809421 |
| Cl | 5.7943743  | 2.6287372  | -1.7816646 |
| Cl | 5.7943743  | 2.6287372  | 1.7816646  |
| B  | -5.2095678 | -0.6578094 | -1.4625801 |
| B  | -3.5081267 | -0.6179453 | -0.9005011 |
| B  | -3.5081267 | -0.6179453 | 0.9005011  |
| B  | -5.2095678 | -0.6578094 | 1.4625801  |
| B  | -6.0151240 | 0.8407785  | -0.9003340 |
| B  | -4.3141840 | 0.8802492  | -1.4668206 |
| B  | -3.2544525 | 0.9128242  | 0.0000000  |
| B  | -4.3141840 | 0.8802492  | 1.4668206  |
| B  | -6.0151240 | 0.8407785  | 0.9003340  |
| C  | -4.7116950 | -1.4112854 | 0.0000000  |
| H  | -4.7807319 | -2.4908755 | 0.0000000  |
| B  | -4.8100261 | 1.8159074  | 0.0000000  |
| C  | -6.1113943 | -0.5970829 | 0.0000000  |
| H  | -7.0159773 | -1.1898906 | 0.0000000  |
| I  | -5.9216084 | -1.8789551 | 3.0542181  |
| I  | -5.9216084 | -1.8789551 | -3.0542181 |
| I  | -7.7005242 | 1.5680144  | -1.9891098 |
| I  | -7.7005242 | 1.5680144  | 1.9891098  |
| I  | -4.9152234 | 3.9522019  | 0.0000000  |
| I  | -3.7826045 | 1.7899772  | -3.3268118 |
| I  | -3.7826045 | 1.7899772  | 3.3268118  |
| I  | -1.3427459 | 1.8644901  | 0.0000000  |
| I  | -2.0415641 | -1.7212139 | -1.9887010 |
| I  | -2.0415641 | -1.7212139 | 1.9887010  |

#### 14.B3LYP-D3/def2-TZVP

|    |           |            |            |
|----|-----------|------------|------------|
| B  | 5.6317998 | -0.4018573 | 1.4706604  |
| B  | 4.3538600 | -1.5306939 | 0.9041111  |
| B  | 4.3538600 | -1.5306939 | -0.9041111 |
| B  | 5.6317998 | -0.4018573 | -1.4706604 |
| B  | 5.2054647 | 1.2488859  | 0.9046881  |
| B  | 3.9298050 | 0.1188504  | 1.4768105  |
| B  | 3.1289327 | -0.5804883 | 0.0000000  |
| B  | 3.9298050 | 0.1188504  | -1.4768105 |
| B  | 5.2054647 | 1.2488859  | -0.9046881 |
| C  | 5.7827006 | -1.2980847 | 0.0000000  |
| H  | 6.5639496 | -2.0448120 | 0.0000000  |
| B  | 3.6587852 | 1.1452655  | 0.0000000  |
| C  | 6.2590167 | 0.2561107  | 0.0000000  |
| H  | 7.3239867 | 0.4371334  | 0.0000000  |
| Cl | 6.7149011 | -0.7344627 | 2.8131553  |
| Cl | 4.0814826 | -3.0300558 | 1.7929581  |



|    |            |            |            |
|----|------------|------------|------------|
| C1 | 3.0638368  | 0.3826013  | 2.9981006  |
| C1 | 1.4279365  | -1.0593283 | 0.0000000  |
| C1 | 2.5220131  | 2.5034487  | 0.0000000  |
| C1 | 3.0638368  | 0.3826013  | -2.9981006 |
| C1 | 6.7149011  | -0.7344627 | -2.8131553 |
| C1 | 4.0814826  | -3.0300558 | -1.7929581 |
| C1 | 5.8201174  | 2.6426660  | -1.7937488 |
| C1 | 5.8201174  | 2.6426660  | 1.7937488  |
| B  | -5.2245544 | -0.6622556 | -1.4704326 |
| B  | -3.5133347 | -0.6187553 | -0.9070225 |
| B  | -3.5133347 | -0.6187553 | 0.9070225  |
| B  | -5.2245544 | -0.6622556 | 1.4704326  |
| B  | -6.0360006 | 0.8443296  | -0.9067870 |
| B  | -4.3289210 | 0.8809936  | -1.4776934 |
| B  | -3.2618449 | 0.9179088  | 0.0000000  |
| B  | -4.3289210 | 0.8809936  | 1.4776934  |
| B  | -6.0360006 | 0.8443296  | 0.9067870  |
| C  | -4.7170748 | -1.4159319 | 0.0000000  |
| H  | -4.7876674 | -2.4930704 | 0.0000000  |
| B  | -4.8274419 | 1.8233867  | 0.0000000  |
| C  | -6.1317914 | -0.5958185 | 0.0000000  |
| H  | -7.0316436 | -1.1914994 | 0.0000000  |
| I  | -5.9539811 | -1.9183336 | 3.0596691  |
| I  | -5.9539811 | -1.9183336 | -3.0596691 |
| I  | -7.7452340 | 1.5752742  | -2.0085694 |
| I  | -7.7452340 | 1.5752742  | 2.0085694  |
| I  | -4.9349381 | 3.9872150  | 0.0000000  |
| I  | -3.7926946 | 1.8016189  | -3.3622616 |
| I  | -3.7926946 | 1.8016189  | 3.3622616  |
| I  | -1.3292451 | 1.8868814  | 0.0000000  |
| I  | -2.0293840 | -1.7379641 | -2.0076264 |
| I  | -2.0293840 | -1.7379641 | 2.0076264  |

#### 14.BP86-D3/def2-TZVP

|    |           |            |            |
|----|-----------|------------|------------|
| B  | 5.6040546 | -0.4002679 | 1.4765196  |
| B  | 4.3188352 | -1.5260252 | 0.9067280  |
| B  | 4.3188352 | -1.5260252 | -0.9067280 |
| B  | 5.6040546 | -0.4002679 | -1.4765196 |
| B  | 5.1849918 | 1.2558647  | 0.9073161  |
| B  | 3.8978947 | 0.1301788  | 1.4794225  |
| B  | 3.0938298 | -0.5680145 | 0.0000000  |
| B  | 3.8978947 | 0.1301788  | -1.4794225 |
| B  | 5.1849918 | 1.2558647  | -0.9073161 |
| C  | 5.7542260 | -1.3014276 | 0.0000000  |
| H  | 6.5367716 | -2.0589149 | 0.0000000  |
| B  | 3.6328536 | 1.1597753  | 0.0000000  |
| C  | 6.2394469 | 0.2564479  | 0.0000000  |
| H  | 7.3130573 | 0.4359909  | 0.0000000  |
| C1 | 6.6820181 | -0.7369552 | 2.8241035  |
| C1 | 4.0371532 | -3.0249194 | 1.7956099  |
| C1 | 3.0316682 | 0.3981804  | 3.0002979  |
| C1 | 1.3908904 | -1.0428670 | 0.0000000  |
| C1 | 2.5060000 | 2.5273413  | 0.0000000  |
| C1 | 3.0316682 | 0.3981804  | -3.0002979 |
| C1 | 6.6820181 | -0.7369552 | -2.8241035 |

|    |            |            |            |
|----|------------|------------|------------|
| C1 | 4.0371532  | -3.0249194 | -1.7956099 |
| C1 | 5.8047304  | 2.6486574  | -1.7967684 |
| C1 | 5.8047304  | 2.6486574  | 1.7967684  |
| B  | -5.2015630 | -0.6673715 | -1.4755730 |
| B  | -3.4875582 | -0.6339274 | -0.9087900 |
| B  | -3.4875582 | -0.6339274 | 0.9087900  |
| B  | -5.2015630 | -0.6673715 | 1.4755730  |
| B  | -6.0064187 | 0.8454712  | -0.9085001 |
| B  | -4.2948376 | 0.8752200  | -1.4783584 |
| B  | -3.2270049 | 0.9046478  | 0.0000000  |
| B  | -4.2948376 | 0.8752200  | 1.4783584  |
| B  | -6.0064187 | 0.8454712  | 0.9085001  |
| C  | -4.6976563 | -1.4314924 | 0.0000000  |
| H  | -4.7727686 | -2.5171193 | 0.0000000  |
| B  | -4.7899874 | 1.8202241  | 0.0000000  |
| C  | -6.1150737 | -0.5995522 | 0.0000000  |
| H  | -7.0265568 | -1.1933729 | 0.0000000  |
| I  | -5.9299916 | -1.9053450 | 3.0738610  |
| I  | -5.9299916 | -1.9053450 | -3.0738610 |
| I  | -7.7050269 | 1.5883997  | -2.0083155 |
| I  | -7.7050269 | 1.5883997  | 2.0083155  |
| I  | -4.8857926 | 3.9784886  | 0.0000000  |
| I  | -3.7540654 | 1.7912146  | -3.3571179 |
| I  | -3.7540654 | 1.7912146  | 3.3571179  |
| I  | -1.2943405 | 1.8603146  | 0.0000000  |
| I  | -2.0108321 | -1.7536102 | -2.0082872 |
| I  | -2.0108321 | -1.7536102 | 2.0082872  |

**15.**

|   |            |            |            |
|---|------------|------------|------------|
| B | -0.8975699 | -6.3182331 | 0.8981463  |
| B | -1.0530296 | -4.6168914 | -1.4532249 |
| B | 0.5330388  | -5.4205676 | -1.4532004 |
| B | 0.5330388  | -5.4205676 | 1.4532004  |
| B | -1.0530296 | -4.6168914 | 1.4532249  |
| B | -1.1492327 | -3.5660487 | 0.0000000  |
| B | 0.3774023  | -3.7197927 | -0.8979424 |
| B | 0.3774023  | -3.7197927 | 0.8979424  |
| B | 0.6898742  | 5.7999438  | -1.4543763 |
| B | -0.1694961 | 4.2377874  | -1.4537215 |
| B | -1.0028838 | 5.7306411  | 0.8987643  |
| B | 1.5230183  | 4.3075837  | -0.8982559 |
| B | 0.3461677  | 3.3148202  | 0.0000000  |
| B | -0.1694961 | 4.2377874  | 1.4537215  |
| B | 0.6898742  | 5.7999438  | 1.4543763  |
| B | 1.5230183  | 4.3075837  | 0.8982559  |
| C | 1.5957146  | 5.7650685  | 0.0000000  |
| B | 0.1747626  | 6.7228948  | 0.0000000  |
| H | 2.5411714  | 6.2935998  | 0.0000000  |
| C | 1.2578335  | -4.8805780 | 0.0000000  |
| H | 2.3371016  | -4.7808941 | 0.0000000  |
| B | 0.6291773  | -6.4725237 | 0.0000000  |
| C | -1.7778456 | -5.1571822 | 0.0000000  |
| H | -2.8571236 | -5.2566560 | 0.0000000  |
| B | -0.8975699 | -6.3182331 | -0.8981463 |
| C | -1.0746226 | 4.2738939  | 0.0000000  |

|    |            |            |            |
|----|------------|------------|------------|
| H  | -2.0200157 | 3.7453207  | 0.0000000  |
| B  | -1.0028838 | 5.7306411  | -0.8987643 |
| I  | 0.3175723  | 1.1844228  | 0.0000000  |
| I  | 3.1798471  | 3.5175322  | -1.9856861 |
| I  | 3.1798471  | 3.5175322  | 1.9856861  |
| I  | 1.3407354  | 6.8161534  | 3.2132749  |
| I  | 1.3407354  | 6.8161534  | -3.2132749 |
| I  | -0.8205578 | 3.2162388  | 3.2096477  |
| I  | -0.8205578 | 3.2162388  | -3.2096477 |
| I  | -2.6607605 | 6.5174446  | 1.9863704  |
| I  | -2.6607605 | 6.5174446  | -1.9863704 |
| I  | 0.2013517  | 8.8558646  | 0.0000000  |
| Br | 1.2146316  | -2.3000482 | 1.8693836  |
| Br | -2.2582590 | -2.0071076 | 0.0000000  |
| Br | -2.0577406 | -4.1939478 | 3.0246356  |
| Br | -1.7363102 | -7.7363507 | 1.8695532  |
| Br | 1.5385120  | -5.8397179 | 3.0251767  |
| Br | 1.5385120  | -5.8397179 | -3.0251767 |
| Br | 1.7388242  | -8.0304462 | 0.0000000  |
| Br | -2.0577406 | -4.1939478 | -3.0246356 |
| Br | -1.7363102 | -7.7363507 | -1.8695532 |
| Br | 1.2146316  | -2.3000482 | -1.8693836 |

## 16.

|    |            |            |            |
|----|------------|------------|------------|
| B  | -5.9460923 | -0.7413201 | 0.8899748  |
| B  | -4.2578212 | -1.0129511 | 1.4339925  |
| B  | -3.2568051 | 0.3730905  | 0.8901787  |
| B  | -4.3189691 | 1.4808819  | 0.0000000  |
| B  | -5.9460923 | -0.7413201 | -0.8899748 |
| B  | -4.8789388 | -1.8780714 | 0.0000000  |
| B  | -3.2062324 | -1.1860689 | 0.0000000  |
| B  | -3.2568051 | 0.3730905  | -0.8901787 |
| C  | -4.9145101 | 0.5699754  | 1.2994331  |
| H  | -5.1336460 | 1.1000205  | 2.2184307  |
| B  | -4.2578212 | -1.0129511 | -1.4339925 |
| B  | 5.2987264  | 1.7467560  | 0.0000000  |
| B  | 3.8000289  | 1.4148622  | 0.8901639  |
| B  | 3.8615767  | -0.2940878 | 1.4344451  |
| B  | 5.4164951  | -1.0067511 | 0.8904356  |
| B  | 3.8000289  | 1.4148622  | -0.8901639 |
| B  | 2.8922210  | 0.1477717  | 0.0000000  |
| B  | 3.8971138  | -1.3589626 | 0.0000000  |
| B  | 5.4164951  | -1.0067511 | -0.8904356 |
| C  | 5.2873058  | 0.6577562  | 1.2997443  |
| H  | 5.7650798  | 0.9764152  | 2.2181564  |
| B  | 3.8615767  | -0.2940878 | -1.4344451 |
| C  | 5.2873058  | 0.6577562  | -1.2997443 |
| B  | 6.2975839  | 0.2502403  | 0.0000000  |
| H  | 5.7650798  | 0.9764152  | -2.2181564 |
| C  | -4.9145101 | 0.5699754  | -1.2994331 |
| H  | -5.1336460 | 1.1000205  | -2.2184307 |
| B  | -5.9802119 | 0.7925849  | 0.0000000  |
| Cl | -5.1794916 | -3.6103424 | 0.0000000  |
| Cl | -3.9587287 | -1.7359458 | 3.0021122  |
| Cl | -3.9587287 | -1.7359458 | -3.0021122 |

|    |            |            |            |
|----|------------|------------|------------|
| C1 | -1.7711608 | -2.1999993 | 0.0000000  |
| C1 | -1.9763318 | 1.0213950  | 1.8941090  |
| C1 | -1.9763318 | 1.0213950  | -1.8941090 |
| C1 | -4.1345136 | 3.2180482  | 0.0000000  |
| C1 | -7.3397048 | 1.8897498  | 0.0000000  |
| C1 | -7.3106354 | -1.1898777 | -1.8939055 |
| C1 | -7.3106354 | -1.1898777 | 1.8939055  |
| C1 | 3.2080062  | -0.7280646 | 3.0013613  |
| C1 | 3.2080062  | -0.7280646 | -3.0013613 |
| C1 | 1.1377083  | 0.1053851  | 0.0000000  |
| C1 | 3.0923921  | 2.6649531  | 1.8938815  |
| C1 | 3.0923921  | 2.6649531  | -1.8938815 |
| C1 | 6.1114323  | 3.2932535  | 0.0000000  |
| C1 | 8.0374156  | 0.4077989  | 0.0000000  |
| C1 | 6.3019098  | -2.1368624 | -1.8949539 |
| C1 | 6.3019098  | -2.1368624 | 1.8949539  |
| C1 | 3.1805742  | -2.9642405 | 0.0000000  |

**17.**

|    |            |            |            |
|----|------------|------------|------------|
| B  | -6.1664327 | -0.7483740 | 0.8904802  |
| B  | -4.4795333 | -1.0159031 | 1.4357955  |
| B  | -3.4857900 | 0.3725271  | 0.8905424  |
| B  | -4.5501039 | 1.4799069  | 0.0000000  |
| B  | -6.1664327 | -0.7483740 | -0.8904802 |
| B  | -5.0967289 | -1.8794872 | 0.0000000  |
| B  | -3.4300687 | -1.1834594 | 0.0000000  |
| B  | -3.4857900 | 0.3725271  | -0.8905424 |
| C  | -5.1410704 | 0.5649100  | 1.3013631  |
| H  | -5.3625714 | 1.0957718  | 2.2190003  |
| B  | -4.4795333 | -1.0159031 | -1.4357955 |
| B  | 5.5843432  | 1.7298832  | 0.0000000  |
| B  | 4.0733476  | 1.4511126  | 0.8903312  |
| B  | 4.0699462  | -0.2564916 | 1.4360515  |
| B  | 5.5957759  | -1.0246088 | 0.8906667  |
| B  | 4.0733476  | 1.4511126  | -0.8903312 |
| B  | 3.1210512  | 0.2204438  | 0.0000000  |
| B  | 4.0668849  | -1.3183904 | 0.0000000  |
| B  | 5.5957759  | -1.0246088 | -0.8906667 |
| C  | 5.5299393  | 0.6411493  | 1.3016493  |
| H  | 6.0205588  | 0.9425208  | 2.2188574  |
| B  | 4.0699462  | -0.2564916 | -1.4360515 |
| Br | 6.5183861  | -2.3010964 | 1.9771325  |
| Br | 6.5183861  | -2.3010964 | -1.9771325 |
| Br | 3.3293248  | -0.7091712 | -3.1417359 |
| Br | 3.3469606  | 2.8500822  | -1.9754492 |
| Br | 3.2234960  | -3.0416107 | 0.0000000  |
| Br | 1.2055851  | 0.2481251  | 0.0000000  |
| Br | 3.3469606  | 2.8500822  | 1.9754492  |
| Br | 3.3293248  | -0.7091712 | 3.1417359  |
| Br | -1.8532098 | -2.2752615 | 0.0000000  |
| Br | -5.4226003 | -3.7700191 | 0.0000000  |
| Br | -2.0816045 | 1.0862997  | -1.9762706 |
| Br | -4.1451286 | -1.8135400 | -3.1432194 |
| Br | -7.6612041 | -1.2468326 | -1.9767433 |
| Br | -4.3407189 | 3.3770548  | 0.0000000  |

|    |            |            |            |
|----|------------|------------|------------|
| Br | -7.6612041 | -1.2468326 | 1.9767433  |
| Br | -4.1451286 | -1.8135400 | 3.1432194  |
| Br | -2.0816045 | 1.0862997  | 1.9762706  |
| Br | 6.5231777  | 3.3917814  | 0.0000000  |
| C  | 5.5299393  | 0.6411493  | -1.3016493 |
| B  | 6.5260044  | 0.1985241  | 0.0000000  |
| Br | 8.4327893  | 0.2866883  | 0.0000000  |
| H  | 6.0205588  | 0.9425208  | -2.2188574 |
| C  | -5.1410704 | 0.5649100  | -1.3013631 |
| H  | -5.3625714 | 1.0957718  | -2.2190003 |
| B  | -6.2076516 | 0.7869320  | 0.0000000  |
| Br | -7.7040587 | 1.9721772  | 0.0000000  |

### 17.B3LYP-D3/def2-TZVP

|    |            |            |            |
|----|------------|------------|------------|
| B  | -6.1879867 | -0.7546807 | 0.8923009  |
| B  | -4.4899823 | -1.0200738 | 1.4399847  |
| B  | -3.4922690 | 0.3784717  | 0.8925326  |
| B  | -4.5633996 | 1.4891781  | 0.0000000  |
| B  | -6.1879867 | -0.7546807 | -0.8923009 |
| B  | -5.1099974 | -1.8870517 | 0.0000000  |
| B  | -3.4354702 | -1.1841379 | 0.0000000  |
| B  | -3.4922690 | 0.3784717  | -0.8925326 |
| C  | -5.1587795 | 0.5692828  | 1.3046918  |
| H  | -5.3798889 | 1.0968791  | 2.2217956  |
| B  | -4.4899823 | -1.0200738 | -1.4399847 |
| B  | 5.6043970  | 1.7388072  | 0.0000000  |
| B  | 4.0859274  | 1.4617215  | 0.8920956  |
| B  | 4.0792349  | -0.2561936 | 1.4403870  |
| B  | 5.6123368  | -1.0332096 | 0.8925992  |
| B  | 4.0859274  | 1.4617215  | -0.8920956 |
| B  | 3.1287697  | 0.2268320  | 0.0000000  |
| B  | 4.0758562  | -1.3225609 | 0.0000000  |
| B  | 5.6123368  | -1.0332096 | -0.8925992 |
| C  | 5.5503426  | 0.6436634  | 1.3051369  |
| H  | 6.0391294  | 0.9424735  | 2.2216575  |
| B  | 4.0792349  | -0.2561936 | -1.4403870 |
| Br | 6.5378851  | -2.3227804 | 1.9910393  |
| Br | 6.5378851  | -2.3227804 | -1.9910393 |
| Br | 3.3303694  | -0.7111128 | -3.1611639 |
| Br | 3.3555678  | 2.8727819  | -1.9889991 |
| Br | 3.2183872  | -3.0586990 | 0.0000000  |
| Br | 1.1968790  | 0.2577319  | 0.0000000  |
| Br | 3.3555678  | 2.8727819  | 1.9889991  |
| Br | 3.3303694  | -0.7111128 | 3.1611639  |
| Br | -1.8443961 | -2.2856215 | 0.0000000  |
| Br | -5.4337906 | -3.7960349 | 0.0000000  |
| Br | -2.0797348 | 1.1005663  | -1.9914287 |
| Br | -4.1508945 | -1.8246881 | -3.1623806 |
| Br | -7.6931593 | -1.2611235 | -1.9903439 |
| Br | -4.3566205 | 3.4035898  | 0.0000000  |
| Br | -7.6931593 | -1.2611235 | 1.9903439  |
| Br | -4.1508945 | -1.8246881 | 3.1623806  |
| Br | -2.0797348 | 1.1005663  | 1.9914287  |
| Br | 6.5559465  | 3.4128775  | 0.0000000  |
| C  | 5.5503426  | 0.6436634  | -1.3051369 |
| B  | 6.5500119  | 0.1932489  | 0.0000000  |

|    |            |           |            |
|----|------------|-----------|------------|
| Br | 8.4737263  | 0.2788485 | 0.0000000  |
| H  | 6.0391294  | 0.9424735 | -2.2216575 |
| C  | -5.1587795 | 0.5692828 | -1.3046918 |
| H  | -5.3798889 | 1.0968791 | -2.2217956 |
| B  | -6.2327001 | 0.7876416 | 0.0000000  |
| Br | -7.7437964 | 1.9813948 | 0.0000000  |

### 17.BP86-D3/def2-TZVP

|    |            |            |            |
|----|------------|------------|------------|
| B  | -6.1493030 | -0.7693514 | 0.8953253  |
| B  | -4.4453919 | -1.0195670 | 1.4443802  |
| B  | -3.4586905 | 0.3907843  | 0.8952705  |
| B  | -4.5432915 | 1.4959887  | 0.0000000  |
| B  | -6.1493030 | -0.7693514 | -0.8953253 |
| B  | -5.0582931 | -1.8936617 | 0.0000000  |
| B  | -3.3873957 | -1.1740254 | 0.0000000  |
| B  | -3.4586905 | 0.3907843  | -0.8952705 |
| C  | -5.1308612 | 0.5680472  | 1.3100109  |
| H  | -5.3585763 | 1.0985486  | 2.2337329  |
| B  | -4.4453919 | -1.0195670 | -1.4443802 |
| B  | 5.5919907  | 1.7334967  | 0.0000000  |
| B  | 4.0649599  | 1.4744584  | 0.8950038  |
| B  | 4.0355341  | -0.2466588 | 1.4448820  |
| B  | 5.5611707  | -1.0457333 | 0.8956209  |
| B  | 4.0649599  | 1.4744584  | -0.8950038 |
| B  | 3.0906836  | 0.2498690  | 0.0000000  |
| B  | 4.0177219  | -1.3145787 | 0.0000000  |
| B  | 5.5611707  | -1.0457333 | -0.8956209 |
| C  | 5.5227005  | 0.6361439  | 1.3106415  |
| H  | 6.0201707  | 0.9310028  | 2.2336978  |
| B  | 4.0355341  | -0.2466588 | -1.4448820 |
| Br | 6.4683672  | -2.3499553 | 1.9899513  |
| Br | 6.4683672  | -2.3499553 | -1.9899513 |
| Br | 3.2775640  | -0.6929586 | -3.1624191 |
| Br | 3.3497924  | 2.8946769  | -1.9876003 |
| Br | 3.1352602  | -3.0363252 | 0.0000000  |
| Br | 1.1606817  | 0.3065828  | 0.0000000  |
| Br | 3.3497924  | 2.8946769  | 1.9876003  |
| Br | 3.2775640  | -0.6929586 | 3.1624191  |
| Br | -1.7883810 | -2.2608554 | 0.0000000  |
| Br | -5.3643749 | -3.8036799 | 0.0000000  |
| Br | -2.0523372 | 1.1248270  | -1.9918068 |
| Br | -4.0980341 | -1.8233012 | -3.1640124 |
| Br | -7.6501614 | -1.2924641 | -1.9892521 |
| Br | -4.3516357 | 3.4107968  | 0.0000000  |
| Br | -7.6501614 | -1.2924641 | 1.9892521  |
| Br | -4.0980341 | -1.8233012 | 3.1640124  |
| Br | -2.0523372 | 1.1248270  | 1.9918068  |
| Br | 6.5631753  | 3.3949418  | 0.0000000  |
| C  | 5.5227005  | 0.6361439  | -1.3106415 |
| B  | 6.5190862  | 0.1721299  | 0.0000000  |
| Br | 8.4427986  | 0.2295074  | 0.0000000  |
| H  | 6.0201707  | 0.9310028  | -2.2336978 |
| C  | -5.1308612 | 0.5680472  | -1.3100109 |
| H  | -5.3585763 | 1.0985486  | -2.2337329 |
| B  | -6.2095995 | 0.7777954  | 0.0000000  |

|    |            |           |           |
|----|------------|-----------|-----------|
| Br | -7.7322346 | 1.9550194 | 0.0000000 |
|----|------------|-----------|-----------|

**18.**

|   |            |            |            |
|---|------------|------------|------------|
| B | -6.3537642 | -0.2993855 | 0.8930908  |
| B | -4.7859052 | -0.9821844 | 1.4419940  |
| B | -3.4722856 | 0.1140636  | 0.8942374  |
| B | -4.2251513 | 1.4574708  | 0.0000000  |
| B | -6.3537642 | -0.2993855 | -0.8930908 |
| B | -5.6004696 | -1.6630717 | 0.0000000  |
| B | -3.8133382 | -1.4051911 | 0.0000000  |
| B | -3.4722856 | 0.1140636  | -0.8942374 |
| C | -5.0294227 | 0.7144979  | 1.3028757  |
| H | -5.1113509 | 1.2860089  | 2.2184682  |
| B | -4.7859052 | -0.9821844 | -1.4419940 |
| B | 4.9322814  | 1.8300582  | 0.0000000  |
| B | 3.6936588  | 0.9118866  | 0.8922622  |
| B | 4.4396625  | -0.6248228 | 1.4411562  |
| B | 6.1502730  | -0.6453994 | 0.8929819  |
| B | 3.6936588  | 0.9118866  | -0.8922622 |
| B | 3.3778910  | -0.6145249 | 0.0000000  |
| B | 4.9041041  | -1.5797384 | 0.0000000  |
| B | 6.1502730  | -0.6453994 | -0.8929819 |
| C | 5.3587976  | 0.8227396  | 1.3025747  |
| H | 5.6682152  | 1.3104253  | 2.2184118  |
| B | 4.4396625  | -0.6248228 | -1.4411562 |
| C | 5.3587976  | 0.8227396  | -1.3025747 |
| B | 6.4525393  | 0.8659915  | 0.0000000  |
| H | 5.6682152  | 1.3104253  | -2.2184118 |
| C | -5.0294227 | 0.7144979  | -1.3028757 |
| H | -5.1113509 | 1.2860089  | -2.2184682 |
| B | -6.0081193 | 1.2032576  | 0.0000000  |
| I | -8.1107797 | -0.4184950 | 2.0986400  |
| I | -7.2988708 | 2.8982447  | 0.0000000  |
| I | -3.4567452 | 3.4444038  | 0.0000000  |
| I | -1.7490425 | 0.4898518  | -2.0922977 |
| I | -1.7490425 | 0.4898518  | 2.0922977  |
| I | -2.4193401 | -3.0284080 | 0.0000000  |
| I | -4.6475272 | -1.9419834 | -3.3441096 |
| I | -4.6475272 | -1.9419834 | 3.3441096  |
| I | -6.4851594 | -3.6089515 | 0.0000000  |
| I | -8.1107797 | -0.4184950 | -2.0986400 |
| I | 3.9166946  | -1.4409596 | 3.3434110  |
| I | 1.4411476  | -1.5128438 | 0.0000000  |
| I | 2.2827789  | 1.9722199  | 2.0944554  |
| I | 2.2827789  | 1.9722199  | -2.0944554 |
| I | 5.0537336  | 3.9572485  | 0.0000000  |
| I | 8.3253134  | 1.8811436  | 0.0000000  |
| I | 7.7041604  | -1.4725269 | -2.0989549 |
| I | 7.7041604  | -1.4725269 | 2.0989549  |
| I | 4.9118577  | -3.7169622 | 0.0000000  |
| I | 3.9166946  | -1.4409596 | -3.3434110 |

**19.**

|   |            |            |           |
|---|------------|------------|-----------|
| B | -6.0668319 | -0.7833406 | 0.8900132 |
|---|------------|------------|-----------|

|    |            |            |            |
|----|------------|------------|------------|
| B  | -4.3735305 | -1.0228090 | 1.4340807  |
| B  | -3.3997954 | 0.3824066  | 0.8901689  |
| B  | -4.4825412 | 1.4700923  | 0.0000000  |
| B  | -6.0668319 | -0.7833406 | -0.8900132 |
| B  | -4.9779741 | -1.8996224 | 0.0000000  |
| B  | -3.3189639 | -1.1752374 | 0.0000000  |
| B  | -3.3997954 | 0.3824066  | -0.8901689 |
| C  | -5.0604731 | 0.5475573  | 1.2994555  |
| H  | -5.2897973 | 1.0731278  | 2.2185580  |
| B  | -4.3735305 | -1.0228090 | -1.4340807 |
| B  | 5.4933677  | 1.7384737  | 0.0000000  |
| B  | 3.9821729  | 1.4602960  | 0.8901846  |
| B  | 3.9787577  | -0.2475454 | 1.4360504  |
| B  | 5.5044390  | -1.0159874 | 0.8906698  |
| B  | 3.9821729  | 1.4602960  | -0.8901846 |
| B  | 3.0298541  | 0.2290386  | 0.0000000  |
| B  | 3.9755883  | -1.3097478 | 0.0000000  |
| B  | 5.5044390  | -1.0159874 | -0.8906698 |
| C  | 5.4387255  | 0.6498549  | 1.3015440  |
| H  | 5.9293352  | 0.9511287  | 2.2187878  |
| B  | 3.9787577  | -0.2475454 | -1.4360504 |
| C  | 5.4387255  | 0.6498549  | -1.3015440 |
| B  | 6.4348261  | 0.2069597  | 0.0000000  |
| H  | 5.9293352  | 0.9511287  | -2.2187878 |
| C  | -5.0604731 | 0.5475573  | -1.2994555 |
| H  | -5.2897973 | 1.0731278  | -2.2185580 |
| B  | -6.1303911 | 0.7499246  | 0.0000000  |
| Br | 3.1324537  | -3.0328358 | 0.0000000  |
| Br | 3.2390226  | -0.6999692 | 3.1421486  |
| Br | 3.2390226  | -0.6999692 | -3.1421486 |
| Br | 1.1143716  | 0.2545200  | 0.0000000  |
| Br | 3.2566174  | 2.8594120  | 1.9755047  |
| Br | 3.2566174  | 2.8594120  | -1.9755047 |
| Br | 6.4328284  | 3.4000967  | 0.0000000  |
| Br | 8.3416422  | 0.2948351  | 0.0000000  |
| Br | 6.4270131  | -2.2923984 | -1.9772879 |
| Br | 6.4270131  | -2.2923984 | 1.9772879  |
| Cl | -5.2455092 | -3.6372316 | 0.0000000  |
| Cl | -1.8622362 | -2.1578768 | 0.0000000  |
| Cl | -2.1309913 | 1.0547346  | 1.8934360  |
| Cl | -2.1309913 | 1.0547346  | -1.8934360 |
| Cl | -4.3308241 | 3.2102809  | 0.0000000  |
| Cl | -7.4223191 | -1.2580025 | 1.8940003  |
| Cl | -7.4223191 | -1.2580025 | -1.8940003 |
| Cl | -7.5104629 | 1.8210037  | 0.0000000  |
| Cl | -4.0603597 | -1.7398020 | 3.0020584  |
| Cl | -4.0603597 | -1.7398020 | -3.0020584 |

#### 19. B3LYP-D3/def2-TZVP

|   |            |            |            |
|---|------------|------------|------------|
| B | -6.0868362 | -0.7900954 | 0.8916132  |
| B | -4.3826409 | -1.0265589 | 1.4380107  |
| B | -3.4054682 | 0.3887349  | 0.8918865  |
| B | -4.4950469 | 1.4791802  | 0.0000000  |
| B | -6.0868362 | -0.7900954 | -0.8916132 |
| B | -4.9894527 | -1.9065905 | 0.0000000  |



|    |            |            |            |
|----|------------|------------|------------|
| B  | -3.3232404 | -1.1752412 | 0.0000000  |
| B  | -3.4054682 | 0.3887349  | -0.8918865 |
| C  | -5.0775640 | 0.5522946  | 1.3030988  |
| H  | -5.3066037 | 1.0748185  | 2.2216357  |
| B  | -4.3826409 | -1.0265589 | -1.4380107 |
| B  | 5.5124767  | 1.7473191  | 0.0000000  |
| B  | 3.9938339  | 1.4708660  | 0.8920684  |
| B  | 3.9866854  | -0.2472492 | 1.4403853  |
| B  | 5.5196813  | -1.0246536 | 0.8925330  |
| B  | 3.9938339  | 1.4708660  | -0.8920684 |
| B  | 3.0359300  | 0.2361794  | 0.0000000  |
| B  | 3.9831078  | -1.3137704 | 0.0000000  |
| B  | 5.5196813  | -1.0246536 | -0.8925330 |
| C  | 5.4581161  | 0.6522214  | 1.3049990  |
| H  | 5.9467545  | 0.9508630  | 2.2216036  |
| B  | 3.9866854  | -0.2472492 | -1.4403853 |
| C  | 5.4581161  | 0.6522214  | -1.3049990 |
| B  | 6.4577077  | 0.2014453  | 0.0000000  |
| H  | 5.9467545  | 0.9508630  | -2.2216036 |
| C  | -5.0775640 | 0.5522946  | -1.3030988 |
| H  | -5.3066037 | 1.0748185  | -2.2216357 |
| B  | -6.1545002 | 0.7497457  | 0.0000000  |
| Br | 3.1263295  | -3.0498983 | 0.0000000  |
| Br | 3.2387531  | -0.7019674 | 3.1615118  |
| Br | 3.2387531  | -0.7019674 | -3.1615118 |
| Br | 1.1037471  | 0.2664496  | 0.0000000  |
| Br | 3.2646531  | 2.8822261  | 1.9891641  |
| Br | 3.2646531  | 2.8822261  | -1.9891641 |
| Br | 6.4646866  | 3.4210374  | 0.0000000  |
| Br | 8.3814375  | 0.2865225  | 0.0000000  |
| Br | 6.4448855  | -2.3145120 | -1.9908815 |
| Br | 6.4448855  | -2.3145120 | 1.9908815  |
| Cl | -5.2532355 | -3.6574009 | 0.0000000  |
| Cl | -1.8568106 | -2.1651715 | 0.0000000  |
| Cl | -2.1319266 | 1.0670899  | 1.9052102  |
| Cl | -2.1319266 | 1.0670899  | -1.9052102 |
| Cl | -4.3451901 | 3.2311662  | 0.0000000  |
| Cl | -7.4483983 | -1.2728166 | 1.9039538  |
| Cl | -7.4483983 | -1.2728166 | -1.9039538 |
| Cl | -7.5461422 | 1.8248082  | 0.0000000  |
| Cl | -4.0648274 | -1.7491520 | 3.0156053  |
| Cl | -4.0648274 | -1.7491520 | -3.0156053 |

#### 19. BP86-D3/def2-TZVP

|   |            |            |            |
|---|------------|------------|------------|
| B | -6.0401387 | -0.8171584 | 0.8949397  |
| B | -4.3283668 | -1.0300448 | 1.4430387  |
| B | -3.3685602 | 0.4025274  | 0.8951878  |
| B | -4.4774963 | 1.4822533  | 0.0000000  |
| B | -6.0401387 | -0.8171584 | -0.8949397 |
| B | -4.9239255 | -1.9207090 | 0.0000000  |
| B | -3.2637320 | -1.1640769 | 0.0000000  |
| B | -3.3685602 | 0.4025274  | -0.8951878 |
| C | -5.0476264 | 0.5434831  | 1.3081661  |
| H | -5.2857527 | 1.0674527  | 2.2332720  |
| B | -4.3283668 | -1.0300448 | -1.4430387 |

|    |            |            |            |
|----|------------|------------|------------|
| B  | 5.5161674  | 1.7359208  | 0.0000000  |
| B  | 3.9853925  | 1.4991300  | 0.8950378  |
| B  | 3.9310698  | -0.2215391 | 1.4447939  |
| B  | 5.4448985  | -1.0425025 | 0.8954221  |
| B  | 3.9853925  | 1.4991300  | -0.8950378 |
| B  | 2.9929530  | 0.2885308  | 0.0000000  |
| B  | 3.8979067  | -1.2893717 | 0.0000000  |
| B  | 5.4448985  | -1.0425025 | -0.8954221 |
| C  | 5.4309036  | 0.6396126  | 1.3104754  |
| H  | 5.9324364  | 0.9270583  | 2.2336624  |
| B  | 3.9310698  | -0.2215391 | -1.4447939 |
| C  | 5.4309036  | 0.6396126  | -1.3104754 |
| B  | 6.4204064  | 0.1613973  | 0.0000000  |
| H  | 5.9324364  | 0.9270583  | -2.2336624 |
| C  | -5.0476264 | 0.5434831  | -1.3081661 |
| H  | -5.2857527 | 1.0674527  | -2.2332720 |
| B  | -6.1305633 | 0.7277718  | 0.0000000  |
| Br | 2.9920038  | -2.9984488 | 0.0000000  |
| Br | 3.1679499  | -0.6569538 | 3.1628066  |
| Br | 3.1679499  | -0.6569538 | -3.1628066 |
| Br | 1.0636574  | 0.3722144  | 0.0000000  |
| Br | 3.2920394  | 2.9297274  | 1.9880926  |
| Br | 3.2920394  | 2.9297274  | -1.9880926 |
| Br | 6.5113983  | 3.3832130  | 0.0000000  |
| Br | 8.3447048  | 0.1910603  | 0.0000000  |
| Br | 6.3333803  | -2.3594719 | -1.9898213 |
| Br | 6.3333803  | -2.3594719 | 1.9898213  |
| Cl | -5.1631413 | -3.6754315 | 0.0000000  |
| Cl | -1.7829042 | -2.1332888 | 0.0000000  |
| Cl | -2.1048423 | 1.0990648  | 1.9102383  |
| Cl | -2.1048423 | 1.0990648  | -1.9102383 |
| Cl | -4.3506862 | 3.2373089  | 0.0000000  |
| Cl | -7.3967464 | -1.3208335 | 1.9053852  |
| Cl | -7.3967464 | -1.3208335 | -1.9053852 |
| Cl | -7.5388527 | 1.7830635  | 0.0000000  |
| Cl | -3.9999850 | -1.7502563 | 3.0207696  |
| Cl | -3.9999850 | -1.7502563 | -3.0207696 |

**20.**

|   |            |            |            |
|---|------------|------------|------------|
| B | -5.9985636 | -0.9282516 | 0.8928325  |
| B | -4.2884520 | -0.9697787 | 1.4409856  |
| B | -3.4864984 | 0.5401491  | 0.8930246  |
| B | -4.6913035 | 1.5017275  | 0.0000000  |
| B | -5.9985636 | -0.9282516 | -0.8928325 |
| B | -4.7867947 | -1.9074171 | 0.0000000  |
| B | -3.2266990 | -0.9972499 | 0.0000000  |
| B | -3.4864984 | 0.5401491  | -0.8930246 |
| C | -5.1543039 | 0.5101675  | 1.3024784  |
| H | -5.4452946 | 1.0084663  | 2.2187005  |
| B | -4.2884520 | -0.9697787 | -1.4409856 |
| B | 5.8168322  | 1.5218208  | 0.0000000  |
| B | 4.2848639  | 1.5968674  | 0.8901694  |
| B | 3.8908741  | -0.0660495 | 1.4339437  |
| B | 5.2035461  | -1.1621293 | 0.8901698  |
| B | 4.2848639  | 1.5968674  | -0.8901694 |

|    |            |            |            |
|----|------------|------------|------------|
| B  | 3.0733348  | 0.6164235  | 0.0000000  |
| B  | 3.6465507  | -1.1013688 | 0.0000000  |
| B  | 5.2035461  | -1.1621293 | -0.8901698 |
| C  | 5.5184724  | 0.4752665  | 1.3002964  |
| H  | 6.0635926  | 0.6562456  | 2.2187579  |
| B  | 3.8908741  | -0.0660495 | -1.4339437 |
| C  | 5.5184724  | 0.4752665  | -1.3002964 |
| B  | 6.3847603  | -0.1831779 | 0.0000000  |
| H  | 6.0635926  | 0.6562456  | -2.2187579 |
| C  | -5.1543039 | 0.5101675  | -1.3024784 |
| H  | -5.4452946 | 1.0084663  | -2.2187005 |
| B  | -6.2457963 | 0.5933770  | 0.0000000  |
| I  | -7.5821198 | -1.6992566 | 2.0981143  |
| I  | -8.0812717 | 1.6752094  | 0.0000000  |
| I  | -4.7343222 | 3.6317008  | 0.0000000  |
| I  | -2.0367141 | 1.5398034  | -2.0980953 |
| I  | -2.0367141 | 1.5398034  | 2.0980953  |
| I  | -1.3208008 | -1.9584619 | 0.0000000  |
| I  | -3.7985739 | -1.8052274 | -3.3438606 |
| I  | -3.7985739 | -1.8052274 | 3.3438606  |
| I  | -4.8724343 | -4.0432156 | 0.0000000  |
| I  | -7.5821198 | -1.6992566 | -2.0981143 |
| Cl | 2.5483080  | -2.4756777 | 0.0000000  |
| Cl | 3.1426160  | -0.3141099 | 2.9988491  |
| Cl | 3.1426160  | -0.3141099 | -2.9988491 |
| Cl | 1.3719573  | 1.0483796  | 0.0000000  |
| Cl | 3.9322791  | 2.9900258  | 1.8932494  |
| Cl | 3.9322791  | 2.9900258  | -1.8932494 |
| Cl | 7.0073900  | 2.7999606  | 0.0000000  |
| Cl | 8.1041003  | -0.4916322 | 0.0000000  |
| Cl | 5.7573704  | -2.4873874 | -1.8934661 |
| Cl | 5.7573704  | -2.4873874 | 1.8934661  |

**21.**

|   |            |            |            |
|---|------------|------------|------------|
| B | -6.1058197 | -0.9768797 | 0.8928381  |
| B | -4.3953206 | -0.9977421 | 1.4410243  |
| B | -3.6120863 | 0.5218151  | 0.8929853  |
| B | -4.8281754 | 1.4688022  | 0.0000000  |
| B | -6.1058197 | -0.9768797 | -0.8928381 |
| B | -4.8822634 | -1.9412588 | 0.0000000  |
| B | -3.3334648 | -1.0122212 | 0.0000000  |
| B | -3.6120863 | 0.5218151  | -0.8929853 |
| C | -5.2791974 | 0.4716717  | 1.3024755  |
| H | -5.5763561 | 0.9664744  | 2.2185837  |
| B | -4.3953206 | -0.9977421 | -1.4410243 |
| B | 5.9469484  | 1.5492475  | 0.0000000  |
| B | 4.4141053  | 1.6321708  | 0.8906497  |
| B | 4.0092916  | -0.0259145 | 1.4358567  |
| B | 5.3143081  | -1.1280751 | 0.8905740  |
| B | 4.4141053  | 1.6321708  | -0.8906497 |
| B | 3.1992969  | 0.6600317  | 0.0000000  |
| B | 3.7605883  | -1.0565122 | 0.0000000  |
| B | 5.3143081  | -1.1280751 | -0.8905740 |
| C | 5.6397045  | 0.5048555  | 1.3021433  |
| H | 6.1876917  | 0.6829368  | 2.2191189  |

|    |            |            |            |
|----|------------|------------|------------|
| B  | 4.0092916  | -0.0259145 | -1.4358567 |
| C  | 5.6397045  | 0.5048555  | -1.3021433 |
| B  | 6.5040077  | -0.1575371 | 0.0000000  |
| H  | 6.1876917  | 0.6829368  | -2.2191189 |
| C  | -5.2791974 | 0.4716717  | -1.3024755 |
| H  | -5.5763561 | 0.9664744  | -2.2185837 |
| B  | -6.3714750 | 0.5415803  | 0.0000000  |
| I  | -7.6799550 | -1.7667420 | 2.0981401  |
| I  | -8.2196366 | 1.6013916  | 0.0000000  |
| I  | -4.8965452 | 3.5980641  | 0.0000000  |
| I  | -2.1745333 | 1.5389550  | -2.0985433 |
| I  | -2.1745333 | 1.5389550  | 2.0985433  |
| I  | -1.4145537 | -1.9475153 | 0.0000000  |
| I  | -3.8950893 | -1.8272579 | -3.3437121 |
| I  | -3.8950893 | -1.8272579 | 3.3437121  |
| I  | -4.9414501 | -4.0779422 | 0.0000000  |
| I  | -7.6799550 | -1.7667420 | -2.0981401 |
| Br | 2.5550651  | -2.5506330 | 0.0000000  |
| Br | 3.1790432  | -0.2959839 | 3.1390302  |
| Br | 3.1790432  | -0.2959839 | -3.1390302 |
| Br | 1.3446160  | 1.1417070  | 0.0000000  |
| Br | 4.0369348  | 3.1625360  | 1.9763520  |
| Br | 4.0369348  | 3.1625360  | -1.9763520 |
| Br | 7.2481048  | 2.9457046  | 0.0000000  |
| Br | 8.3784989  | -0.5176652 | 0.0000000  |
| Br | 5.9124976  | -2.5854422 | -1.9767772 |
| Br | 5.9124976  | -2.5854422 | 1.9767772  |

**22.**

|   |            |            |            |
|---|------------|------------|------------|
| B | -0.9189896 | -5.8328200 | 0.8997230  |
| B | -0.9992276 | -4.1232015 | -1.4559035 |
| B | 0.5475047  | -4.9978589 | -1.4558130 |
| B | 0.5475047  | -4.9978589 | 1.4558130  |
| B | -0.9992276 | -4.1232015 | 1.4559035  |
| B | -1.0491658 | -3.0677209 | 0.0000000  |
| B | 0.4670626  | -3.2881948 | -0.8999209 |
| B | 0.4670626  | -3.2881948 | 0.8999209  |
| B | 0.5803582  | 5.3753707  | -1.4554137 |
| B | -0.1287005 | 3.7457631  | -1.4549630 |
| B | -1.0928274 | 5.1591064  | 0.8993953  |
| B | 1.5446120  | 3.9630252  | -0.8991664 |
| B | 0.4683314  | 2.8733998  | 0.0000000  |
| B | -0.1287005 | 3.7457631  | 1.4549630  |
| B | 0.5803582  | 5.3753707  | 1.4554137  |
| B | 1.5446120  | 3.9630252  | 0.8991664  |
| C | 1.4798724  | 5.4167396  | 0.0000000  |
| B | -0.0151726 | 6.2487088  | 0.0000000  |
| H | 2.3754159  | 6.0275458  | 0.0000000  |
| C | 1.2896408  | -4.4893034 | 0.0000000  |
| H | 2.3725728  | -4.4374524 | 0.0000000  |
| B | 0.5971003  | -6.0543666 | 0.0000000  |
| C | -1.7415484 | -4.6320103 | 0.0000000  |
| H | -2.8244505 | -4.6833074 | 0.0000000  |
| B | -0.9189896 | -5.8328200 | -0.8997230 |
| C | -1.0274701 | 3.7054888  | 0.0000000  |

|    |            |            |            |
|----|------------|------------|------------|
| H  | -1.9228253 | 3.0943583  | 0.0000000  |
| B  | -1.0928274 | 5.1591064  | -0.8993953 |
| C1 | 1.3080435  | -2.0322933 | 1.7847054  |
| C1 | -2.0226277 | -1.6104382 | 0.0000000  |
| C1 | -1.9187196 | -3.7003299 | 2.8853746  |
| C1 | -1.9187196 | -3.7003299 | -2.8853746 |
| C1 | -1.7607659 | -7.0893115 | 1.7832598  |
| C1 | -1.7607659 | -7.0893115 | -1.7832598 |
| C1 | 1.4671060  | -5.4189186 | 2.8855839  |
| C1 | 1.4671060  | -5.4189186 | -2.8855839 |
| C1 | 1.5653221  | -7.5140508 | 0.0000000  |
| C1 | 1.3080435  | -2.0322933 | -1.7847054 |
| C1 | 0.5783219  | 1.1282672  | 0.0000000  |
| C1 | 2.9722682  | 3.4632868  | 1.7831284  |
| C1 | 2.9722682  | 3.4632868  | -1.7831284 |
| C1 | 1.0599212  | 6.2655164  | 2.8858813  |
| C1 | -0.1210148 | 7.9972716  | 0.0000000  |
| C1 | -2.5208879 | 5.6572236  | 1.7833639  |
| C1 | -2.5208879 | 5.6572236  | -1.7833639 |
| C1 | -0.6079089 | 2.8520714  | -2.8831050 |
| C1 | -0.6079089 | 2.8520714  | 2.8831050  |
| C1 | 1.0599212  | 6.2655164  | -2.8858813 |

### 23.

|    |            |            |            |
|----|------------|------------|------------|
| B  | -0.3649124 | -6.0349020 | 0.8981986  |
| B  | -0.9911969 | -4.4453923 | -1.4533818 |
| B  | 0.7560757  | -4.7712500 | -1.4532388 |
| B  | 0.7560757  | -4.7712500 | 1.4532388  |
| B  | -0.9911969 | -4.4453923 | 1.4533818  |
| B  | -1.3769380 | -3.4643555 | 0.0000000  |
| B  | 0.1299992  | -3.1818231 | -0.8989830 |
| B  | 0.1299992  | -3.1818231 | 0.8989830  |
| B  | 0.8516152  | 5.1084451  | -1.4532842 |
| B  | -0.6172746 | 4.1075195  | -1.4533719 |
| B  | -0.6818885 | 5.8151916  | 0.8984759  |
| B  | 0.9155993  | 3.4014701  | -0.8976201 |
| B  | -0.5795570 | 3.0517651  | 0.0000000  |
| B  | -0.6172746 | 4.1075195  | 1.4533719  |
| B  | 0.8516152  | 5.1084451  | 1.4532842  |
| B  | 0.9155993  | 3.4014701  | 0.8976201  |
| C  | 1.6397232  | 4.6658014  | 0.0000000  |
| B  | 0.8121183  | 6.1636012  | 0.0000000  |
| H  | 2.7226825  | 4.7063736  | 0.0000000  |
| C  | 1.2999033  | -4.0490291 | 0.0000000  |
| H  | 2.3081179  | -3.6513374 | 0.0000000  |
| B  | 1.1432490  | -5.7532564 | 0.0000000  |
| C  | -1.5354789 | -5.1679611 | 0.0000000  |
| H  | -2.5439742 | -5.5649429 | 0.0000000  |
| B  | -0.3649124 | -6.0349020 | -0.8981986 |
| C  | -1.4052875 | 4.5512728  | 0.0000000  |
| H  | -2.4882815 | 4.5096219  | 0.0000000  |
| B  | -0.6818885 | 5.8151916  | -0.8984759 |
| Br | 0.5338432  | -1.5836983 | 1.8663527  |
| Br | -2.8835976 | -2.2828043 | 0.0000000  |
| Br | -2.0760189 | -4.3221552 | 3.0239242  |

|    |            |            |            |
|----|------------|------------|------------|
| Br | -0.7704862 | -7.6319738 | 1.8693447  |
| Br | 1.8403127  | -4.8925251 | 3.0244241  |
| Br | 2.6454842  | -6.9373677 | 0.0000000  |
| Br | -0.7704862 | -7.6319738 | -1.8693447 |
| Br | -2.0760189 | -4.3221552 | -3.0239242 |
| Br | 0.5338432  | -1.5836983 | -1.8663527 |
| Br | 1.8403127  | -4.8925251 | -3.0244241 |
| Br | -1.4819249 | 1.3678791  | 0.0000000  |
| Br | 1.9376807  | 2.1071394  | 1.8680485  |
| Br | 1.7956919  | 5.6542150  | 3.0247810  |
| Br | 1.7956919  | 5.6542150  | -3.0247810 |
| Br | 1.7138158  | 7.8503161  | 0.0000000  |
| Br | -1.6955293 | 7.1140196  | 1.8697663  |
| Br | -1.6955293 | 7.1140196  | -1.8697663 |
| Br | -1.5585382 | 3.5579311  | 3.0248924  |
| Br | -1.5585382 | 3.5579311  | -3.0248924 |
| Br | 1.9376807  | 2.1071394  | -1.8680485 |

**24.**

|   |            |            |            |
|---|------------|------------|------------|
| B | -0.4426909 | -6.3512401 | 0.8989310  |
| B | -0.9983603 | -4.7349092 | -1.4549420 |
| B | 0.7379982  | -5.1354353 | -1.4542321 |
| B | 0.7379982  | -5.1354353 | 1.4542321  |
| B | -0.9983603 | -4.7349092 | 1.4549420  |
| B | -1.3413825 | -3.7389099 | 0.0000000  |
| B | 0.1815517  | -3.5188523 | -0.8997738 |
| B | 0.1815517  | -3.5188523 | 0.8997738  |
| B | 0.8502397  | 5.4618331  | -1.4546839 |
| B | -0.5884941 | 4.4091272  | -1.4544131 |
| B | -0.7128547 | 6.1149673  | 0.8993809  |
| B | 0.9734295  | 3.7566521  | -0.8981730 |
| B | -0.5138799 | 3.3554838  | 0.0000000  |
| B | -0.5884941 | 4.4091272  | 1.4544131  |
| B | 0.8502397  | 5.4618331  | 1.4546839  |
| B | 0.9734295  | 3.7566521  | 0.8981730  |
| C | 1.6561396  | 5.0465772  | 0.0000000  |
| B | 0.7737255  | 6.5160774  | 0.0000000  |
| H | 2.7366762  | 5.1259365  | 0.0000000  |
| C | 1.3148788  | -4.4367588 | 0.0000000  |
| H | 2.3393838  | -4.0840778 | 0.0000000  |
| B | 1.0813758  | -6.1345594 | 0.0000000  |
| I | -0.9613610 | -8.1123225 | 1.9851938  |
| I | 2.6867603  | -7.5389562 | 0.0000000  |
| I | 1.9299099  | -5.3290977 | -3.2122709 |
| I | 0.6934450  | -1.7508566 | -1.9760919 |
| I | -2.1894716 | -4.5360525 | -3.2130600 |
| I | -2.9633470 | -2.3489954 | 0.0000000  |
| I | 0.6934450  | -1.7508566 | 1.9760919  |
| I | -2.1894716 | -4.5360525 | 3.2130600  |
| I | 1.9299099  | -5.3290977 | 3.2122709  |
| I | -1.4323328 | 1.4341258  | 0.0000000  |
| I | -1.6032394 | 3.7553290  | -3.2129072 |
| I | 2.1473765  | 2.3416198  | -1.9827058 |
| I | 1.8686138  | 6.1086065  | -3.2137620 |
| I | 1.7006898  | 8.4368756  | 0.0000000  |
| I | 1.8686138  | 6.1086065  | 3.2137620  |

|   |            |            |            |
|---|------------|------------|------------|
| I | -1.8825565 | 7.5286995  | 1.9866160  |
| I | -1.6032394 | 3.7553290  | 3.2129072  |
| I | 2.1473765  | 2.3416198  | 1.9827058  |
| C | -1.5765014 | -5.4340611 | 0.0000000  |
| H | -2.6010544 | -5.7865411 | 0.0000000  |
| B | -0.4426909 | -6.3512401 | -0.8989310 |
| I | -0.9613610 | -8.1123225 | -1.9851938 |
| I | -1.8825565 | 7.5286995  | -1.9866160 |
| C | -1.3938606 | 4.8256701  | 0.0000000  |
| H | -2.4743428 | 4.7459763  | 0.0000000  |
| B | -0.7128547 | 6.1149673  | -0.8993809 |

#### 24.B3LYP-D3/def2-TZVP

|   |            |            |            |
|---|------------|------------|------------|
| B | -0.4338239 | -6.4074853 | 0.9053122  |
| B | -1.0029592 | -4.7833301 | -1.4654530 |
| B | 0.7396257  | -5.1784907 | -1.4642972 |
| B | 0.7396257  | -5.1784907 | 1.4642972  |
| B | -1.0029592 | -4.7833301 | 1.4654530  |
| B | -1.3553178 | -3.7834465 | 0.0000000  |
| B | 0.1689208  | -3.5540938 | -0.9060495 |
| B | 0.1689208  | -3.5540938 | 0.9060495  |
| B | 0.8556664  | 5.5075189  | -1.4647369 |
| B | -0.5895664 | 4.4555323  | -1.4646703 |
| B | -0.7063328 | 6.1737278  | 0.9057172  |
| B | 0.9707763  | 3.7898766  | -0.9043133 |
| B | -0.5204852 | 3.3945135  | 0.0000000  |
| B | -0.5895664 | 4.4555323  | 1.4646703  |
| B | 0.8556664  | 5.5075189  | 1.4647369  |
| B | 0.9707763  | 3.7898766  | 0.9043133  |
| C | 1.6617986  | 5.0850806  | 0.0000000  |
| B | 0.7837375  | 6.5696435  | 0.0000000  |
| H | 2.7403678  | 5.1586984  | 0.0000000  |
| C | 1.3128690  | -4.4726207 | 0.0000000  |
| H | 2.3329502  | -4.1144449 | 0.0000000  |
| B | 1.0911978  | -6.1828440 | 0.0000000  |
| I | -0.9561804 | -8.1927250 | 2.0028417  |
| I | 2.7300861  | -7.5890396 | 0.0000000  |
| I | 1.9541111  | -5.3635428 | -3.2399989 |
| I | 0.6848380  | -1.7615943 | -1.9922699 |
| I | -2.2152902 | -4.5925212 | -3.2421626 |
| I | -3.0135249 | -2.3955757 | 0.0000000  |
| I | 0.6848380  | -1.7615943 | 1.9922699  |
| I | -2.2152902 | -4.5925212 | 3.2421626  |
| I | 1.9541111  | -5.3635428 | 3.2399989  |
| I | -1.4700246 | 1.4607669  | 0.0000000  |
| I | -1.6270319 | 3.7996924  | -3.2414076 |
| I | 2.1570437  | 2.3529285  | -1.9991243 |
| I | 1.8974310  | 6.1558730  | -3.2416858 |
| I | 1.7386027  | 8.5061626  | 0.0000000  |
| I | 1.8974310  | 6.1558730  | 3.2416858  |
| I | -1.8906181 | 7.6067956  | 2.0039133  |
| I | -1.6270319 | 3.7996924  | 3.2414076  |
| I | 2.1570437  | 2.3529285  | 1.9991243  |
| C | -1.5779278 | -5.4902620 | 0.0000000  |
| H | -2.5981144 | -5.8480886 | 0.0000000  |

|   |            |            |            |
|---|------------|------------|------------|
| B | -0.4338239 | -6.4074853 | -0.9053122 |
| I | -0.9561804 | -8.1927250 | -2.0028417 |
| I | -1.8906181 | 7.6067956  | -2.0039133 |
| C | -1.3954606 | 4.8795782  | 0.0000000  |
| H | -2.4739752 | 4.8055545  | 0.0000000  |
| B | -0.7063328 | 6.1737278  | -0.9057172 |

**24.BP86-D3/def2-TZVP**

|   |            |            |            |
|---|------------|------------|------------|
| B | -0.4467907 | -6.3670010 | 0.9068433  |
| B | -1.0041710 | -4.7359375 | -1.4678568 |
| B | 0.7403331  | -5.1441274 | -1.4665673 |
| B | 0.7403331  | -5.1441274 | 1.4665673  |
| B | -1.0041710 | -4.7359375 | 1.4678568  |
| B | -1.3490911 | -3.7321054 | 0.0000000  |
| B | 0.1811624  | -3.5127296 | -0.9075689 |
| B | 0.1811624  | -3.5127296 | 0.9075689  |
| B | 0.8526957  | 5.4753168  | -1.4673959 |
| B | -0.5861345 | 4.4061661  | -1.4670646 |
| B | -0.7210820 | 6.1264149  | 0.9074618  |
| B | 0.9860153  | 3.7561099  | -0.9056836 |
| B | -0.5057129 | 3.3442390  | 0.0000000  |
| B | -0.5861345 | 4.4061661  | 1.4670646  |
| B | 0.8526957  | 5.4753168  | 1.4673959  |
| B | 0.9860153  | 3.7561099  | 0.9056836  |
| C | 1.6689634  | 5.0610487  | 0.0000000  |
| B | 0.7697502  | 6.5385620  | 0.0000000  |
| H | 2.7553657  | 5.1470611  | 0.0000000  |
| C | 1.3239820  | -4.4400397 | 0.0000000  |
| H | 2.3551088  | -4.0870238 | 0.0000000  |
| B | 1.0846173  | -6.1528239 | 0.0000000  |
| I | -0.9758264 | -8.1445608 | 2.0030029  |
| I | 2.7041697  | -7.5728461 | 0.0000000  |
| I | 1.9456408  | -5.3407658 | -3.2405773 |
| I | 0.7028223  | -1.7273637 | -1.9923403 |
| I | -2.2075051 | -4.5327566 | -3.2426631 |
| I | -2.9918141 | -2.3333829 | 0.0000000  |
| I | 0.7028223  | -1.7273637 | 1.9923403  |
| I | -2.2075051 | -4.5327566 | 3.2426631  |
| I | 1.9456408  | -5.3407658 | 3.2405773  |
| I | -1.4271637 | 1.4021127  | 0.0000000  |
| I | -1.6079114 | 3.7382675  | -3.2417530 |
| I | 2.1809994  | 2.3327589  | -1.9983355 |
| I | 1.8793396  | 6.1333390  | -3.2429465 |
| I | 1.6974184  | 8.4820897  | 0.0000000  |
| I | 1.8793396  | 6.1333390  | 3.2429465  |
| I | -1.9119266 | 7.5464020  | 2.0046623  |
| I | -1.6079114 | 3.7382675  | 3.2417530  |
| I | 2.1809994  | 2.3327589  | 1.9983355  |
| C | -1.5898229 | -5.4409433 | 0.0000000  |
| H | -2.6209886 | -5.7937463 | 0.0000000  |
| B | -0.4467907 | -6.3670010 | -0.9068433 |
| I | -0.9758264 | -8.1445608 | -2.0030029 |
| I | -1.9119266 | 7.5464020  | -2.0046623 |
| C | -1.4018849 | 4.8225781  | 0.0000000  |
| H | -2.4882191 | 4.7361547  | 0.0000000  |



B -0.7210820 6.1264149 -0.9074618

**25.**

B -1.0851443 -5.8220772 0.8998752  
B -1.0343785 -4.1111651 -1.4558564  
B 0.4406788 -5.1017210 -1.4558943  
B 0.4406788 -5.1017210 1.4558943  
B -1.0343785 -4.1111651 1.4558564  
B -1.0031468 -3.0543755 0.0000000  
B 0.4916005 -3.3912664 -0.8998776  
B 0.4916005 -3.3912664 0.8998776  
B 0.5575282 5.4564561 -1.4529148  
B 0.0356787 3.7569119 -1.4522801  
B -1.0804758 5.0492395 0.8977136  
B 1.6739034 4.1651851 -0.8975091  
B 0.7269630 2.9594032 0.0000000  
B 0.0356787 3.7569119 1.4522801  
B 0.5575282 5.4564561 1.4529148  
B 1.6739034 4.1651851 0.8975091  
C 1.4498425 5.6043132 0.0000000  
B -0.1320284 6.2551292 0.0000000  
H 2.2704233 6.3129081 0.0000000  
C 1.2197701 -4.6513472 0.0000000  
H 2.3034447 -4.6830899 0.0000000  
B 0.4095395 -6.1588620 0.0000000  
C -1.8134104 -4.5618108 0.0000000  
H -2.8970257 -4.5293362 0.0000000  
B -1.0851443 -5.8220772 -0.8998752  
C -0.8559286 3.6104068 0.0000000  
H -1.6762159 2.9014532 0.0000000  
B -1.0804758 5.0492395 -0.8977136  
Cl 1.4273332 -2.2060113 1.7874706  
Cl -1.8618543 -1.5270056 0.0000000  
Cl -1.9189079 -3.6188516 2.8850976  
Cl -1.9189079 -3.6188516 -2.8850976  
Cl -2.0198454 -7.0105799 1.7837256  
Cl -2.0198454 -7.0105799 -1.7837256  
Cl 1.3258684 -5.5915386 2.8854550  
Cl 1.3258684 -5.5915386 -2.8854550  
Cl 1.2643086 -7.6875523 0.0000000  
Cl 1.4273332 -2.2060113 -1.7874706  
Br 1.0813144 1.0828270 0.0000000  
Br -0.3599028 2.7360052 3.0208656  
Br -0.3599028 2.7360052 -3.0208656  
Br -2.6840178 5.4305158 1.8684189  
Br -2.6840178 5.4305158 -1.8684189  
Br 0.9520994 6.4718947 3.0253295  
Br 0.9520994 6.4718947 -3.0253295  
Br -0.4842289 8.1352996 0.0000000  
Br 3.2770984 3.7828222 1.8683639  
Br 3.2770984 3.7828222 -1.8683639

**26.**

B -0.8307896 -6.2639398 0.8994657

|    |            |            |            |
|----|------------|------------|------------|
| B  | -1.0743339 | -4.5706793 | -1.4556281 |
| B  | 0.5491149  | -5.2927837 | -1.4554318 |
| B  | 0.5491149  | -5.2927837 | 1.4554318  |
| B  | -1.0743339 | -4.5706793 | 1.4556281  |
| B  | -1.2247286 | -3.5261544 | 0.0000000  |
| B  | 0.3050862  | -3.5998891 | -0.8994424 |
| B  | 0.3050862  | -3.5998891 | 0.8994424  |
| B  | 0.7902000  | 5.6504918  | -1.4544149 |
| B  | -0.2637769 | 4.2129306  | -1.4541251 |
| B  | -0.8971971 | 5.8013318  | 0.8990862  |
| B  | 1.4230295  | 4.0622670  | -0.8984821 |
| B  | 0.1273632  | 3.2305113  | 0.0000000  |
| B  | -0.2637769 | 4.2129306  | 1.4541251  |
| B  | 0.7902000  | 5.6504918  | 1.4544149  |
| B  | 1.4230295  | 4.0622670  | 0.8984821  |
| C  | 1.6836529  | 5.4983979  | 0.0000000  |
| B  | 0.3985303  | 6.6324377  | 0.0000000  |
| H  | 2.6895228  | 5.9005695  | 0.0000000  |
| C  | 1.2396102  | -4.7156501 | 0.0000000  |
| H  | 2.3125078  | -4.5596756 | 0.0000000  |
| B  | 0.6996438  | -6.3391928 | 0.0000000  |
| C  | -1.7651709 | -5.1477510 | 0.0000000  |
| H  | -2.8381710 | -5.3029971 | 0.0000000  |
| B  | -0.8307896 | -6.2639398 | -0.8994657 |
| C  | -1.1569191 | 4.3658773  | 0.0000000  |
| H  | -2.1629458 | 3.9639577  | 0.0000000  |
| B  | -0.8971971 | 5.8013318  | -0.8990862 |
| C1 | 1.0186558  | -2.2650516 | 1.7808087  |
| C1 | -2.3285041 | -2.1644969 | 0.0000000  |
| C1 | -2.0288323 | -4.2360982 | 2.8853464  |
| C1 | -2.0288323 | -4.2360982 | -2.8853464 |
| C1 | -1.5478490 | -7.5955358 | 1.7829070  |
| C1 | -1.5478490 | -7.5955358 | -1.7829070 |
| C1 | 1.5036321  | -5.6241627 | 2.8858860  |
| C1 | 1.5036321  | -5.6241627 | -2.8858860 |
| C1 | 1.8025058  | -7.6998170 | 0.0000000  |
| C1 | 1.0186558  | -2.2650516 | -1.7808087 |
| I  | -0.1755228 | 1.1213235  | 0.0000000  |
| I  | 2.9624763  | 3.0634432  | -1.9867577 |
| I  | 2.9624763  | 3.0634432  | 1.9867577  |
| I  | 1.5662093  | 6.5766939  | 3.2121336  |
| I  | 1.5662093  | 6.5766939  | -3.2121336 |
| I  | -1.0383966 | 3.2837775  | 3.2108968  |
| I  | -1.0383966 | 3.2837775  | -3.2108968 |
| I  | -2.4382809 | 6.7964439  | 1.9878072  |
| I  | -2.4382809 | 6.7964439  | -1.9878072 |
| I  | 0.7007302  | 8.7441809  | 0.0000000  |

**27.**

|   |            |            |            |
|---|------------|------------|------------|
| B | -0.8975699 | -6.3182331 | 0.8981463  |
| B | -1.0530296 | -4.6168914 | -1.4532249 |
| B | 0.5330388  | -5.4205676 | -1.4532004 |
| B | 0.5330388  | -5.4205676 | 1.4532004  |
| B | -1.0530296 | -4.6168914 | 1.4532249  |
| B | -1.1492327 | -3.5660487 | 0.0000000  |

|    |            |            |            |
|----|------------|------------|------------|
| B  | 0.3774023  | -3.7197927 | -0.8979424 |
| B  | 0.3774023  | -3.7197927 | 0.8979424  |
| B  | 0.6898742  | 5.7999438  | -1.4543763 |
| B  | -0.1694961 | 4.2377874  | -1.4537215 |
| B  | -1.0028838 | 5.7306411  | 0.8987643  |
| B  | 1.5230183  | 4.3075837  | -0.8982559 |
| B  | 0.3461677  | 3.3148202  | 0.0000000  |
| B  | -0.1694961 | 4.2377874  | 1.4537215  |
| B  | 0.6898742  | 5.7999438  | 1.4543763  |
| B  | 1.5230183  | 4.3075837  | 0.8982559  |
| C  | 1.5957146  | 5.7650685  | 0.0000000  |
| B  | 0.1747626  | 6.7228948  | 0.0000000  |
| H  | 2.5411714  | 6.2935998  | 0.0000000  |
| C  | 1.2578335  | -4.8805780 | 0.0000000  |
| H  | 2.3371016  | -4.7808941 | 0.0000000  |
| B  | 0.6291773  | -6.4725237 | 0.0000000  |
| C  | -1.7778456 | -5.1571822 | 0.0000000  |
| H  | -2.8571236 | -5.2566560 | 0.0000000  |
| B  | -0.8975699 | -6.3182331 | -0.8981463 |
| C  | -1.0746226 | 4.2738939  | 0.0000000  |
| H  | -2.0200157 | 3.7453207  | 0.0000000  |
| B  | -1.0028838 | 5.7306411  | -0.8987643 |
| I  | 0.3175723  | 1.1844228  | 0.0000000  |
| I  | 3.1798471  | 3.5175322  | -1.9856861 |
| I  | 3.1798471  | 3.5175322  | 1.9856861  |
| I  | 1.3407354  | 6.8161534  | 3.2132749  |
| I  | 1.3407354  | 6.8161534  | -3.2132749 |
| I  | -0.8205578 | 3.2162388  | 3.2096477  |
| I  | -0.8205578 | 3.2162388  | -3.2096477 |
| I  | -2.6607605 | 6.5174446  | 1.9863704  |
| I  | -2.6607605 | 6.5174446  | -1.9863704 |
| I  | 0.2013517  | 8.8558646  | 0.0000000  |
| Br | 1.2146316  | -2.3000482 | 1.8693836  |
| Br | -2.2582590 | -2.0071076 | 0.0000000  |
| Br | -2.0577406 | -4.1939478 | 3.0246356  |
| Br | -1.7363102 | -7.7363507 | 1.8695532  |
| Br | 1.5385120  | -5.8397179 | 3.0251767  |
| Br | 1.5385120  | -5.8397179 | -3.0251767 |
| Br | 1.7388242  | -8.0304462 | 0.0000000  |
| Br | -2.0577406 | -4.1939478 | -3.0246356 |
| Br | -1.7363102 | -7.7363507 | -1.8695532 |
| Br | 1.2146316  | -2.3000482 | -1.8693836 |

## 27.BP86-D3/def2-TZVP

|   |            |            |            |
|---|------------|------------|------------|
| B | -0.8965205 | -6.3681673 | 0.9035922  |
| B | -1.0550094 | -4.6566088 | -1.4619892 |
| B | 0.5335414  | -5.4638989 | -1.4619521 |
| B | 0.5335414  | -5.4638989 | 1.4619521  |
| B | -1.0550094 | -4.6566088 | 1.4619892  |
| B | -1.1532964 | -3.5996995 | 0.0000000  |
| B | 0.3748728  | -3.7529049 | -0.9033614 |
| B | 0.3748728  | -3.7529049 | 0.9033614  |
| B | 0.6927743  | 5.8431347  | -1.4643552 |
| B | -0.1710040 | 4.2777871  | -1.4635577 |
| B | -1.0043685 | 5.7842478  | 0.9049378  |

|    |            |            |            |
|----|------------|------------|------------|
| B  | 1.5260172  | 4.3372691  | -0.9043820 |
| B  | 0.3448546  | 3.3461735  | 0.0000000  |
| B  | -0.1710040 | 4.2777871  | 1.4635577  |
| B  | 0.6927743  | 5.8431347  | 1.4643552  |
| B  | 1.5260172  | 4.3372691  | 0.9043820  |
| C  | 1.6021688  | 5.8031428  | 0.0000000  |
| B  | 0.1776828  | 6.7745738  | 0.0000000  |
| H  | 2.5474717  | 6.3270138  | 0.0000000  |
| C  | 1.2612619  | -4.9197904 | 0.0000000  |
| H  | 2.3381322  | -4.8188354 | 0.0000000  |
| B  | 0.6316788  | -6.5220318 | 0.0000000  |
| C  | -1.7828029 | -5.2011070 | 0.0000000  |
| H  | -2.8596888 | -5.3017579 | 0.0000000  |
| B  | -0.8965205 | -6.3681673 | -0.9035922 |
| C  | -1.0796152 | 4.3192717  | 0.0000000  |
| H  | -2.0248334 | 3.7953411  | 0.0000000  |
| B  | -1.0043685 | 5.7842478  | -0.9049378 |
| I  | 0.2992450  | 1.1906561  | 0.0000000  |
| I  | 3.2048287  | 3.5373964  | -2.0032622 |
| I  | 3.2048287  | 3.5373964  | 2.0032622  |
| I  | 1.3623666  | 6.8717554  | 3.2411676  |
| I  | 1.3623666  | 6.8717554  | -3.2411676 |
| I  | -0.8408520 | 3.2434909  | 3.2372670  |
| I  | -0.8408520 | 3.2434909  | -3.2372670 |
| I  | -2.6842624 | 6.5805198  | 2.0039999  |
| I  | -2.6842624 | 6.5805198  | -2.0039999 |
| I  | 0.2213704  | 8.9337619  | 0.0000000  |
| Br | 1.2195036  | -2.3205391 | 1.8830150  |
| Br | -2.2757965 | -2.0298062 | 0.0000000  |
| Br | -2.0702586 | -4.2313368 | 3.0466084  |
| Br | -1.7422648 | -7.7994472 | 1.8831512  |
| Br | 1.5495118  | -5.8855041 | 3.0471236  |
| Br | 1.5495118  | -5.8855041 | -3.0471236 |
| Br | 1.7544148  | -8.0912946 | 0.0000000  |
| Br | -2.0702586 | -4.2313368 | -3.0466084 |
| Br | -1.7422648 | -7.7994472 | -1.8831512 |
| Br | 1.2195036  | -2.3205391 | -1.8830150 |

## 27.BP86-D3/def2-TZVP

|   |            |            |            |
|---|------------|------------|------------|
| B | -0.8902033 | -6.3366515 | 0.9054407  |
| B | -1.0559234 | -4.6221065 | -1.4650261 |
| B | 0.5415796  | -5.4246069 | -1.4649503 |
| B | 0.5415796  | -5.4246069 | 1.4649503  |
| B | -1.0559234 | -4.6221065 | 1.4650261  |
| B | -1.1585499 | -3.5631079 | 0.0000000  |
| B | 0.3756892  | -3.7104728 | -0.9051804 |
| B | 0.3756892  | -3.7104728 | 0.9051804  |
| B | 0.6964021  | 5.8054129  | -1.4669572 |
| B | -0.1816911 | 4.2422559  | -1.4660961 |
| B | -1.0060971 | 5.7569094  | 0.9064760  |
| B | 1.5206397  | 4.2915145  | -0.9058564 |
| B | 0.3286808  | 3.3059736  | 0.0000000  |
| B | -0.1816911 | 4.2422559  | 1.4660961  |
| B | 0.6964021  | 5.8054129  | 1.4669572  |
| B | 1.5206397  | 4.2915145  | 0.9058564  |

|    |            |            |            |
|----|------------|------------|------------|
| C  | 1.6107463  | 5.7614361  | 0.0000000  |
| B  | 0.1867540  | 6.7419926  | 0.0000000  |
| H  | 2.5671731  | 6.2830371  | 0.0000000  |
| C  | 1.2713683  | -4.8762616 | 0.0000000  |
| H  | 2.3562634  | -4.7698674 | 0.0000000  |
| B  | 0.6441207  | -6.4846530 | 0.0000000  |
| C  | -1.7857393 | -5.1708289 | 0.0000000  |
| H  | -2.8706675 | -5.2767442 | 0.0000000  |
| B  | -0.8902033 | -6.3366515 | -0.9054407 |
| C  | -1.0951506 | 4.2879309  | 0.0000000  |
| H  | -2.0515098 | 3.7662753  | 0.0000000  |
| B  | -1.0060971 | 5.7569094  | -0.9064760 |
| I  | 0.2754392  | 1.1552578  | 0.0000000  |
| I  | 3.1861012  | 3.4773291  | -2.0038136 |
| I  | 3.1861012  | 3.4773291  | 2.0038136  |
| I  | 1.3662521  | 6.8250104  | 3.2421674  |
| I  | 1.3662521  | 6.8250104  | -3.2421674 |
| I  | -0.8517726 | 3.2157330  | 3.2375232  |
| I  | -0.8517726 | 3.2157330  | -3.2375232 |
| I  | -2.6731092 | 6.5664155  | 2.0047625  |
| I  | -2.6731092 | 6.5664155  | -2.0047625 |
| I  | 0.2385058  | 8.8955251  | 0.0000000  |
| Br | 1.2111906  | -2.2760829 | 1.8869928  |
| Br | -2.2849682 | -1.9976668 | 0.0000000  |
| Br | -2.0682366 | -4.1998207 | 3.0506161  |
| Br | -1.7260797 | -7.7714779 | 1.8855309  |
| Br | 1.5546653  | -5.8430579 | 3.0511115  |
| Br | 1.5546653  | -5.8430579 | -3.0511115 |
| Br | 1.7687201  | -8.0509060 | 0.0000000  |
| Br | -2.0682366 | -4.1998207 | -3.0506161 |
| Br | -1.7260797 | -7.7714779 | -1.8855309 |
| Br | 1.2111906  | -2.2760829 | -1.8869928 |
